# Supplementary material for: Cluster randomised controlled trial to determine the effect of peer delivery HIV self-testing to support linkage to HIV prevention among young women in rural KwaZulu-Natal, South Africa: a study protocol
Source: PubMed Central journal article supplement (PMC7008432; doi:10.1136/bmjopen-2019-033435), 2019-12-23
Supplement: bmjopen-2019-033435.draft_revisions.pdf [file bmjopen-2019-033435.draft_revisions.pdf]

# BMJ Open

BMJ Open is committed to open peer review. As part of this commitment we make the peer review history of every article we publish publicly available.

When an article is published we post the peer reviewers' comments and the authors' responses online. We also post the versions of the paper that were used during peer review. These are the versions that the peer review comments apply to.

The versions of the paper that follow are the versions that were submitted during the peer review process. They are not the versions of record or the final published versions. They should not be cited or distributed as the published version of this manuscript.

BMJ Open is an open access journal and the full, final, typeset and author-corrected version of record of the manuscript is available on our site with no access controls, subscription charges or pay-per-view fees (<http://bmjopen.bmj.com>).

If you have any questions on BMJ Open's open peer review process please email [info.bmjopen@bmj.com](mailto:info.bmjopen@bmj.com)

# BMJ Open

## A cluster randomised controlled trial to determine the effect of peer delivery HIV Self-Testing to support linkage to HIV prevention among young women in rural KwaZulu-Natal, South Africa: study protocol

|                               |                                                                                                                                                                                                                                                                                                                                                                                                                                                                                                                                                                                                                                                                                                                                                                                                                                                                                                                                                                                                                                                                                                                                                                   |
|-------------------------------|-------------------------------------------------------------------------------------------------------------------------------------------------------------------------------------------------------------------------------------------------------------------------------------------------------------------------------------------------------------------------------------------------------------------------------------------------------------------------------------------------------------------------------------------------------------------------------------------------------------------------------------------------------------------------------------------------------------------------------------------------------------------------------------------------------------------------------------------------------------------------------------------------------------------------------------------------------------------------------------------------------------------------------------------------------------------------------------------------------------------------------------------------------------------|
| Journal:                      | <i>BMJ Open</i>                                                                                                                                                                                                                                                                                                                                                                                                                                                                                                                                                                                                                                                                                                                                                                                                                                                                                                                                                                                                                                                                                                                                                   |
| Manuscript ID                 | bmjopen-2019-033435                                                                                                                                                                                                                                                                                                                                                                                                                                                                                                                                                                                                                                                                                                                                                                                                                                                                                                                                                                                                                                                                                                                                               |
| Article Type:                 | Protocol                                                                                                                                                                                                                                                                                                                                                                                                                                                                                                                                                                                                                                                                                                                                                                                                                                                                                                                                                                                                                                                                                                                                                          |
| Date Submitted by the Author: | 06-Aug-2019                                                                                                                                                                                                                                                                                                                                                                                                                                                                                                                                                                                                                                                                                                                                                                                                                                                                                                                                                                                                                                                                                                                                                       |
| Complete List of Authors:     | Adeagbo, Oluwafemi; Africa Centre for Health and Population Studies; University of Johannesburg, Sociology<br>Mthiyane, Nondumiso; Africa Centre for Health and Population Studies<br>Herbst, Carina; Africa Centre for Health and Population Studies<br>Seeley, Janet; Africa Centre for Health and Population Studies; London School of Hygiene and Tropical Medicine,<br>Chimbindi, Natsayi; Africa Centre for Health and Population Studies<br>Mee, Paul; London School of Hygiene and Tropical Medicine,<br>Neuman, Melissa; London School of Hygiene and Tropical Medicine,<br>Dreyer, Jaco; Africa Centre for Health and Population Studies<br>Smit, Theresa; Africa Centre for Health and Population Studies<br>Okesola, Nonhlanhla; Africa Centre for Health and Population Studies<br>Johnson, Cheryl; World Health Organization, Department of HIV/AIDS<br>Hatzold, Karin; Population Services International<br>Corbett, Liz; LSHTM, Infectious and Tropical Diseases<br>Cowan, F; Liverpool School of Tropical Medicine, International Public Health; CeSHHAR Zimbabwe,<br>Shahmanesh, Maryam; University College London, Institute for Global Health |
| Keywords:                     | HIV/AIDS, Peer delivery model, South Africa, PrEP, ART, HIV Self-testing                                                                                                                                                                                                                                                                                                                                                                                                                                                                                                                                                                                                                                                                                                                                                                                                                                                                                                                                                                                                                                                                                          |
|                               |                                                                                                                                                                                                                                                                                                                                                                                                                                                                                                                                                                                                                                                                                                                                                                                                                                                                                                                                                                                                                                                                                                                                                                   |

SCHOLARONE™  
Manuscripts

1  
2  
3  
4 **A cluster randomised controlled trial to determine the effect of peer delivery HIV Self-Testing**  
5 **to support linkage to HIV prevention among young women in rural KwaZulu-Natal, South**  
6 **Africa: study protocol**  
7  
8  
9

10 *Adeagbo OA<sup>1,2,4</sup>, Mthiyane TN<sup>1</sup>, Herbst C<sup>1</sup>, Mee P<sup>3</sup>, Neuman M<sup>3</sup>, Dreyer J<sup>1</sup>, Chimbindi N<sup>1,2</sup>, Smit T<sup>1</sup>;*  
11 *Okesola N<sup>1</sup>, Johnson C<sup>7</sup>, HatZold K<sup>8</sup>, Seeley J<sup>1,3</sup>, Cowan F<sup>5,6</sup>, Corbett L<sup>3</sup>, Shahmanesh M<sup>1,2</sup>*  
12

13 <sup>1</sup>Africa Health Research Institute, South Africa (formerly known as Africa Centre for Health & Population  
14 Studies)  
15

16 <sup>2</sup>University College London, UK  
17

18 <sup>3</sup>London School of Hygiene & Tropical Medicine, UK  
19

20 <sup>4</sup>University of Johannesburg, South Africa  
21

22 <sup>5</sup>The Centre for Sexual Health and HIV/AIDS Research, Zimbabwe  
23

24 <sup>6</sup>Liverpool School of Tropical Medicine  
25

26 <sup>7</sup>World Health Organisation, Switzerland  
27

28 <sup>8</sup>Population Services International  
29

30 **Corresponding Author:** Maryam Shahmanesh, Institute of Global Health, University College London,  
31 W61E JB, United Kingdom [m.shahmanesh@ucl.ac.uk](mailto:m.shahmanesh@ucl.ac.uk)  
32  
33

34 **ABSTRACT**  
35  
36  
37

38 **Introduction:**  
39

40 A cluster randomised controlled trial (cRCT) to determine whether HIV self-testing (HIVST) delivered by  
41 peers either directly or through incentivised peer-networks, could increase the uptake of antiretroviral  
42 therapy and Pre-Exposure Prophylaxis amongst young women (18-24 years) is being undertaken in an HIV  
43 hyperendemic area in KwaZulu-Natal, South Africa.  
44

45 **Methods and analysis:**  
46

47 A 3-arm cRCT started mid-March 2019, in 24 areas in rural KwaZulu-Natal. Twenty-four pairs of peer  
48 navigators working with ~12000 young people aged 18-30 over a period of 6 months were randomised  
49 to: (1) *incentivised-peer-networks (IPN)*: peer-navigators recruited participants “seeds” to distribute up to  
50 5 HIVST packs and HIV prevention information to peers within their social networks. Seeds receive an  
51 incentive (20 Rand = \$1.5) for each respondent who contacts a peer-navigator for additional HIVST packs  
52 to distribute;(2) *peer-navigator-distribution (PND)*: peer-navigators distribute HIVST packs and  
53 information directly to young people; (3) *standard of care (SOC)*: peer-navigators distribute referral slips  
54 and information. All arms promote sexual health information and provide barcoded clinic referral slips to  
55  
56  
57

1  
2  
3 facilitate linkage to HIV testing, prevention and care services. The primary outcome is the difference in  
4 linkage rate between arms, defined as the number of women (18-24 years) per peer-navigators month of  
5 outreach work (/pnm) who linked to clinic-based PrEP eligibility screening or started ART, based on HIV-  
6 status, within 90 days of receiving the clinic referral slip.  
7

### 8 **Ethics and dissemination:**

9  
10 This study was approved by the Institutional Review Boards at the World Health Organization, Switzerland  
11 (**Protocol ID: STAR CRT, South Africa**), London School of Hygiene and Tropical Medicine, UK (**Reference:**  
12 **15990-1**), University of KwaZulu-Natal (**BFC311/18**), and the KwaZulu-Natal Department of Health  
13 (**Reference: KZ\_201901\_012**), South Africa. The findings of this trial will be disseminated at local, regional  
14 and international meetings and through peer-reviewed publications.  
15  
16

17 **Trial registration number:** Clinicaltrials.gov - NCT03751826. Protocol date: 17 January 2019  
18

19  
20  
21  
22 **Keywords:** HIV/AIDS; HIV Self-testing; peer delivery model; PrEP; ART; South Africa  
23  
24  
25

26 **XXXXXXXXXXXXXXXXXXXXXXXXXXXXXXXXXXXXXXXXXXXXXXXXXXXXXXXXXXXXXXXXXXXXXXXXXXXXXXXXXXXXXXXXXXXXXXXXXXXX**  
27

### 28 **Strengths and limitations of this study**

- 29  
30  
31  
32  
33  
34  
35  
36  
37  
38  
39  
40  
41  
42  
43  
44  
45  
46  
47
- There is no evidence on the use of HIVST to improve linkage to effective HIV prevention such as Pre-Exposure Prevention.
  - There is limited evidence on the strength and limitations of different peer-to-peer approaches to improve uptake of HIV testing and linkage to care and prevention.
  - Strengths include the use of a cRCT with rigorous measurement of the outcome linkage to care or prevention by arm, combined with process evaluation and cost-effectiveness studies.
  - By embedding this cRCT within a longitudinal demographic surveillance setting, we are able to measure the population reach of the intervention.
  - Limitations include a small risk of contamination across clusters and potential for coercive test or intimate partner violence.

48 **XXXXXXXXXXXXXXXXXXXXXXXXXXXXXXXXXXXXXXXXXXXXXXXXXXXXXXXXXXXXXXXXXXXXXXXXXXXXXXXXXXXXXXXXXXXXXXXXXXXX**  
49  
50  
51  
52  
53  
54  
55  
56  
57  
58  
59  
60

## 61 **INTRODUCTION**

62 South Africa has the largest burden of HIV globally with 14% national prevalence rate and an estimated  
63 7.9 million people living with HIV in 2017<sup>1</sup>. The province of KwaZulu-Natal (KZN) is mostly affected by the  
64 epidemic with an 18.1% prevalence rate in 2017<sup>1</sup>, while our research setting in uMkhanyakude district has  
65 an estimated 30% in the general population<sup>2</sup>. Of the new 88,000 HIV infections recorded amongst young  
66 people aged 15-24 years in 2017, 66 000 were among females<sup>1</sup>. Evidence from South Africa and other  
67 countries in sub-Saharan Africa shows that most young people living with HIV are undiagnosed and  
68 therefore not linked to care<sup>3,4</sup>. Despite an increasing range of effective HIV prevention and treatment  
69  
70

1  
2  
3 interventions, including condoms, antiretroviral (ART) based prevention e.g. pre-exposure prophylaxis  
4 (PrEP), universal test and treat (UTT) <sup>5,6</sup> and voluntary medical male circumcision (VMMC) there is high  
5 HIV incidence rate in adolescent girls and young women (AGYW) with an estimated 5% per annum in aged  
6 15-19 years and 8% per annum in aged 20-24 years respectively in our research setting in Hlabisa sub-  
7 district <sup>7</sup>. A recent treatment-as-prevention (TasP) trial conducted in this area failed to show an impact on  
8 incidence in part due to the challenge of testing and linking young people and men<sup>8</sup>. Patient level fears  
9 (e.g. stigma, labelling and discrimination) and facility level barriers (e.g. distance, waiting times and  
10 provider attitudes) continue to be barriers to young people not seeking HIV care services in health facilities  
11 <sup>9-11</sup>. There is an urgent need to increase the proportion of those (particularly AGYW) who know their HIV  
12 status and take up effective HIV prevention – including ART based care and prevention.

13  
14  
15  
16 To increase global testing rates and early access to treatment or PrEP, HIV self-testing (HIVST) – which  
17 refers to a simple saliva self-test similar to a pregnancy test - has been identified as a potential method  
18 given its privacy and convenience <sup>12-14</sup>. Studies have shown high acceptability and uptake of HIVST  
19 particularly amongst first time testers and young people <sup>13-17</sup> and A growing number of studies have shown  
20 that rapid oral fluid testing was preferred to blood-based testing <sup>18-20</sup>. The OraQuick® In-home HIV test  
21 (OraSure Technologies, Inc., Bethlehem, PA, manufactured in Thailand) was recently pre-qualified by the  
22 World Health Organization for international procurement<sup>21</sup>. Field based use confirmed the high accuracy  
23 of HIVST accuracy, albeit with some variability across different educational levels<sup>14,16,22</sup>. HIVST kit  
24 (OraQuick) product is currently available in South Africa and has been endorsed by the National  
25 Department of Health (NDoH).

26  
27  
28  
29 Effective biomedical innovations such as PrEP have the potential to be gamechangers in the HIV epidemic,  
30 however, their effectiveness will depend on HIV testing uptake and subsequent linkage to care and  
31 prevention <sup>23-25</sup>. The key findings from systematic reviews of the HIV treatment cascade suggest that: (1)  
32 community-based delivery models, including adherence clubs, community health workers delivering de-  
33 centralised care, and task-shifting to lay caregivers providing support across conditions, improve both ART  
34 uptake and sustained retention in low and middle-income settings <sup>26-28</sup>; (2) peer support is effective to  
35 deliver health intervention particularly to hard-to-reach groups <sup>29,30</sup>. Moreover, evidence to date suggests  
36 that community delivered HIVST supports uptake of testing and linkage to HIV care especially amongst  
37 young people <sup>17,31</sup>. However, there is limited data on the role of community based HIVST and/or peer  
38 support as a route into HIV prevention.

39  
40  
41  
42 Here, we describe a cluster randomised controlled trial to address this critical gap in HIVST evidence and  
43 linkage for young women aged 18-24 years. The overall aim of this trial is to determine whether HIVST  
44 delivered by peers either directly or through incentivised peer-networks, can increase the uptake of  
45 antiretroviral therapy (ART) and Pre-Exposure Prophylaxis (PrEP) amongst older adolescent girls and  
46 young women at higher risk of HIV (18-24 years) in a high HIV transmission setting in KwaZulu-Natal (KZN),  
47 South Africa. . To the best of our knowledge, this is one of the first trials to test the effectiveness of oral-  
48 based HIVST to improve uptake of prevention in South Africa.

## Specific Objectives

The specific aims of this trial are to: (1) increase the knowledge of HIV status among young women aged 18-24 years old and their young male partners through the distribution of HIVST through incentivised peer networks or direct distribution by peer navigators compared to peer navigators referring them into HIV testing services; (2) determine an increase in the rate of linkage among young women aged 18-24 years to HIV prevention and treatment services facilitated by distribution of HIVST through incentivised peer networks or direct distribution by peer navigators compared to peer navigators referring into services; (3) determine an overall increase in young men and women aged 18-30 aware of their status and linked to HIV care and prevention; (4) conduct a process evaluation of the acceptability, feasibility, and reach (out of school, recently migrant and living in remote areas) in linking 18-24-year-old women to HIV prevention and treatment services of HIVST distribution through incentivised peer networks, or direct distribution by peer navigators or peer navigators referring into services and (5) measure the cost per 18-24-year-old woman linked to prevention and care through peer-led incentivised HIVST delivery system or direct distribution of HIVST by peer navigators, compared to peer navigator referring into services.

## METHODS/DESIGN

### Theory of Change

The intervention that is being tested in this cRCT is guided by a theory of change developed through mental models and deductive development<sup>32</sup>. We theorised that the distribution of HIVST kits (including linkage information and referral slips) via peer navigators or peer social networks (respondent driven sampling - RDS) would lead to improved HIV prevention cascade, HIV testing uptake and linkage to HIV treatment or prevention services such as PrEP, amongst young women aged 18-24 years by creating peer-led demand, supporting young people to explore their candidacy for HIV care and prevention in privacy, and using social networks to reach those who need it most<sup>33</sup>. Work done by our group suggested that fear of HIV-related stigma of attending a clinic for HIV testing and discrimination from healthcare providers or community may be addressed by HIVST since individuals can test privately anywhere without fear of being seen or judged<sup>2</sup>. Furthermore, formative work from our group suggested that community based delivery of services through youth friendly and accessible clinics for the study participants (walk-ins and those who present the study referral slips) could provide confirmatory HIV testing, treatment, prevention, contraceptives and other health services<sup>34,35</sup>. We used the SPIRIT reporting guidelines in this article<sup>36</sup>.

### Trial design

This is a 3-arm cluster randomised controlled trial (two intervention arms and one control arm) launched in mid-March 2019 and currently being carried out by 24 pairs of peer navigators that work with ~12,000 young people aged 18-30 in 24 wards ('Izigodi' in the local language - IsiZulu) in rural uMkhanyakude district of KwaZulu-Natal (KZN), South Africa. This cRCT is comparing two models of peer delivery of HIVST through incentivised respondent driven peer networks and direct distribution by peer navigators compared to standard of care (referral to HIV testing, prevention and care services by peer navigators) in improving the uptake of HIV testing, prevention and care amongst young women (18-24 years) reached by the study arm. Eight (8) pairs of peer navigators were randomised and assigned to each study arm with the intention of reaching 5000 young women aged 18-24 years with HIVST packs (including referral slips) and/or linkage information (including PrEP, contraceptives, ART etc.) during the six-month of community

1  
2  
3 outreach. Peer navigators are randomised to 1 of 3 arms: 1) *incentivised-peer-networks*: peer-navigators  
4 recruited participants “seeds” to distribute up to 5 HIVST packs and HIV prevention information to peers  
5 within social networks. Seeds receive an incentive (20 Rand = \$1.5) for each respondent who contacts a  
6 peer-navigators for additional HIVST packs to distribute; (2) *peer-navigator-distribution*: peer-navigators  
7 distribute HIVST packs and information directly to young people; (3) *standard of care*: peer-navigators  
8 distribute referral slips and information. All arms promote sexual health and HIV care and prevention  
9 (including PrEP and ART) and provide barcoded clinic referral slips to facilitate linkage to HIV testing,  
10 prevention and care services (figure 1).  
11  
12

13 The unit of randomisation is the pair of peer navigators working in each of the 24 areas included in the  
14 study. The areas are not adjoining, and each is bordered by a natural boundary (e.g. roads or streams) or  
15 by a sizeable distance. Although contamination is inevitable in this type of cRCT, the spillover effects are  
16 contained by measuring the outcome by exposure to the peer-navigator cluster in multiple ways, including  
17 barcoded and colour coded referral slips as well as peer-navigator and ward names that determine  
18 participant exposure to specific intervention components. Coupled with this, we are conducting a mixed  
19 method process evaluation that provides context and add nuance to our understanding of any  
20 contamination.  
21  
22  
23

### 24 **Description of study arms**

25  
26 Intervention arm 1 – incentivised network distribution of HIVST: n=8 pairs of peer navigators are using  
27 RDS approach to distribute HIVST packs. Each pair of peer navigators recruits n=10, 18-24 years old female  
28 seeds. Each seed fills a brief *service recipient questionnaire* – self-filled on a tablet. Following which they  
29 receive a session from the peer-navigator on the HIV prevention services available, the importance of  
30 sexual health, the benefits of HIV testing PrEP and ART, and a demonstration of HIVST. Seeds are asked to  
31 recruit AGYW aged 18-24 years preferentially but not exclusively and to avoid distribution of -HIVST to  
32 those under the age of 18 or over the age of 30. All seeds are asked to complete a brief check of their  
33 understanding of the information provided to them, particularly the unreliability of HIVST on ART, the  
34 window period, the recommended support to those under 18 using HIVST, and the need for confirmatory  
35 testing. As shown in fig. 3 individuals who return the coupons undergo the same procedure as the seeds.  
36 They are also given up to 5 uniquely numbered incentivised recruitment coupons and HIVST kits to pass  
37 on. When coupons are returned, the original individual who handed out the coupon receives a sum of  
38 R20 (\$1.5) in airtime per friend or peer who returns the coupon. This sum is a reimbursement for the time  
39 that they have spent in explaining and demonstrating the use of an HIVST and is not seen to be an undue  
40 incentive to coerce members of their social network to participate. There is no gender restriction of those  
41 recruited through the networks, however the primary outcome will be measured in young women aged  
42 18-24 only.  
43  
44  
45  
46  
47  
48

49 Intervention arm 2: peer navigator direct distribution of HIVST: n=8 pairs of peer navigators are  
50 distributing HIVST packs directly to young people aged 18-30 years over a period of six months. Each  
51 person recruited fills a brief *service recipient questionnaire* – self-filled on a tablet. Following which they  
52 receive a session from the peer-navigator on the HIV prevention services available, the importance of  
53 sexual health, the benefits of HIV testing, PrEP and ART, and a demonstration of HIV self-screening. All  
54 participants are asked to complete a brief check of their understanding of the information provided to  
55  
56  
57



1  
2  
3 them, particularly the unreliability of HIVST on ART, the window period, the recommended support to  
4 those under 18 using HIVST, and the need for confirmatory testing.  
5  
6

7 Control - arm 3: n=8 pairs of peer navigators are currently distributing linkage information packs and  
8 encourage young people aged 18-30 years to test for HIV at clinics, and link to services/care. Each female  
9 aged 18-30 approached fills a brief service *recipient questionnaire* – self-filled on a tablet. Following which  
10 they receive a session from the peer-navigator on the HIV prevention services available, the importance  
11 of sexual health, the benefits of HIV testing PrEP and ART.  
12  
13  
14  
15

16  
17 **Figure 1: Flow diagram of trial enrolment, randomisation and intervention arms**  
18  
19

20  
21 **Study oversight**

22 An independent scientific Technical Advisory Group (TAG) was formed by the Unitaid-funded HIV Self-  
23 Testing Africa initiative (STAR – a consortium of scientists conducting HIV self-testing related research in  
24 different countries) to monitor and supervise progress of data collection, provide independent review of  
25 data collected during all cRCTs conducted under the STAR initiative, and assist investigators in  
26 disseminating results. TAG comprises members with expertise in HIV epidemiology, statistics, health  
27 economics, social science and AGYW. TAG will convey periodic meetings to review data and discuss any  
28 issues emanating from this trial.  
29  
30  
31

32  
33 **Setting**

34 This study is taking place in 24 areas in Hlabisa sub-district (estimated 228, 000 population) of  
35 uMkhanyakude district in KZN (figure 2). The trial builds on one of the largest population-based HIV  
36 incidence cohorts in the world and longstanding research infrastructure in KZN. The study area is mostly  
37 rural, and poor compared with other parts of South Africa, with high levels of unemployment and the local  
38 language is IsiZulu. The demographic surveillance area provides over 16 years of household history, and  
39 over a million person-years of follow-up through annual individual-level surveys, which capture sexual  
40 behaviour and partnerships, reproductive histories and contraception use, access to HIV testing and care,  
41 access to HIV prevention services (including VMMC), as well as socio-demographic information. The trial  
42 will be coordinated from our research office in Somkhele – a rural area in Hlabisa sub-district.  
43  
44  
45  
46  
47  
48  
49  
50  
51

52  
53 **Figure 2: Map of study sites in Hlabisa sub-district in KwaZulu-Natal, South Africa**  
54  
55  
56  
57  
58  
59  
60



### Study recruitment and procedures

Peer navigators are a cadre of recently matriculated youth or fresh graduates aged 18-30 years (male and female) recruited from the research community through the local municipal and traditional leaders and they have undergone a rigorous 12-week training in the study procedures and HIVST. The 24 pairs of peer navigators were selected from over 100 youth recruited after several training and assessments. The Peer navigator intervention has been developed in close collaboration with the NDoH and mirrors the South African cadre of community caregivers. We anticipate that the peer navigators working with ~ 12000 young people aged 18-30 will reach ~5000 young women aged 18-24 years in the three-study arms within the six-month of their community outreach work. Before the peer navigators distribute the colour coordinated HIVST packs with unique identifiers in the intervention arms 1 and 2 or information packs in arm 3, the packs are being scanned in and participants are provided with information about the study and fill a brief *service recipient questionnaire* to be completed within Research Electronic Data Capture (REDCap - developed by Vanderbilt University, USA)<sup>37</sup> on a tablet (figure 3). The information is relevant to service delivery only, the date of recruitment, and the ID of peer navigator who recruited them, their age and area of residence. Name, ID (e.g. SA national number), and telephone or WhatsApp contact are optional. Those who are recruited through RDS will also be asked to provide data on their network size, barcode of the RDS coupons and the additional HIVST kits are scanned in. Peer navigators spend ~ 30 minutes with each willing participant to explain the benefits of linking to care and prevention. Those explaining HIVST need 15-20 minutes extra and some young people require more time or more visits. This data is captured in REDCap for the purpose of process evaluation and costing. This data will be used in an aggregate way to understand the process and cost of the service delivery. Individualised data from the survey will only be used in those participants that consent to their clinical data being linked and used for research purposes. If a participant withdraws their consent at any time, their data will be deleted from the research data set.

Participants are being offered study enrollment at the point that they enter any service for the purpose of confirmatory HIV test, and/or eligibility screening for PrEP or HIV treatment. This is being conducted by trained clinical research assistants in mobile and fixed clinics (figure 4). All young women aged 18-24 years coming to one of the 11 primary health care clinics (PHC) or the mobile clinics in the surveillance sites are being directed by our institute data collection clerks to our research nurses. In both settings, the clinical research assistants or the research nurses explain the study and screen the young person for eligibility using a brief eligibility screening questionnaire on REDCap on a tablet. This includes questions to ascertain eligibility as well as arm of the study. If available, the barcode with the unique identifier on the referral slip or the participant's demographic data is used to identify potentially eligible attendees (women aged 18-24 years who have been linked to clinic through the peer navigators). Interested eligible participants are directed to the study research assistant or nurse in a private room who provides information about the study and go through the process of informed consent. Participants provide written informed consent for enrollment into the study and specifically to use the information on their linkage to care as an outcome and to link their baseline questions.

Irrespective of whether they consent to the study, all individuals attending clinics are offered confirmatory HIV testing, with two point of care tests and then blood sent to laboratories for ELISA testing (Genscreen™ ULTRA HIV Ag-Ab qualitative immunoassay [4<sup>th</sup> Generation] Biorad, Marnes-la-Coquette, France) individuals who test HIV-negative receive counseling around the benefits of PrEP and HIV-positive

individuals receive counselling around the benefits of immediate starting of ART. If they agree they will undergo clinical screening for PrEP and ART. Screening includes Point of Care (POC) tests for creatinine (StatSensor-I create-test strips, Nova Biomedical UK) to assess renal function and Hepatitis B (Alere Determine™ HBsAg, Alere International Limited, Ballybrit Galway, Ireland; Architect i2000 analyzer, Abbott Diagnostics, Abbott Park, IL, USA), with vaccination offered to those who are negative, and sexual behavior questionnaire to assess eligibility. ART is started by the professional nurses in any of 11 PHCs in the study site. Patients who are eligible for PrEP are started in the three PrEP providing clinics (the mobile vans or the fixed urban adolescent and youth friendly clinic). Persons who are not eligible for PrEP receive counselling and, as indicated, a clinic referral with the screening results. A professional nurse initiates PrEP or ART usually on the same day or within two weeks of the screening visit. The professional nurse provides PrEP counselling that includes (1) *sexual health promotion*, with an emphasis on tackling the multiple health-related behaviors that will affect fertility and sexual pleasure (STIs, mental health, alcohol, diet and exercise); (2) assessment of fertility desire and contraception counselling; (3) choice of contraception and condoms; (4) HIV-negative men are also counselled around the benefits of VMMC and referred accordingly.

The counsellors provide counselling on adherence and develop an individualised adherence plan with the offer of face-to-face or virtual (WhatsApp/ text based) adherence support. If the participant agrees to immediate PrEP initiation, s/he is issued with a month's supply of generic tenofovir disoproxil fumarate and emtricitabine (TDF/FTC). Baseline and follow-up bloods are taken and processed as per SA National Department of Health guidelines. The professional nurse registers the participant at the clinic (or updates the record if the participant is already registered) so that the participant's records are available should the participant seeks care there. Participants receive a phone call seven days after initiating PrEP to complete a standard symptom screen for adverse effects and be referred to clinic for care if necessary. Participants have a clinic appointment scheduled one month, after PrEP initiation, as per national guidelines; appointments for refills and monitoring will be quarterly thereafter through either the mobile clinic, or other community-based refill points. Neutral text message reminders are provided for participants who have access to private messaging and phone calls. Participants are able to reschedule their appointments by text message, WhatsApp or calling the clinical hotline. Contact information is provided for the clinics whom participants can contact at any time.

### **Inclusion and exclusion criteria**

Complete inclusion and exclusion criteria are summarised in tables 1 and 2. There are criteria for different recruitment stages in the trial. Above all, participants must not be less than 18 and not more than 30 years old. They must provide informed consent, not currently on ART and must be living in the study sites.

Table 1: Inclusion and exclusion criteria for receiving the intervention, i.e. the recruitment by Peer Navigators and/or Seeds to receive HIVST packs or clinical referral slips

| <b>Inclusion criteria</b>                                             | <b>Exclusion criteria</b>                          |
|-----------------------------------------------------------------------|----------------------------------------------------|
| Participant must not be older than 30 years and younger than 18 years | Participants under 18 years or older than 30 years |
| Participant must agree to participate                                 | Participant unwilling to participate               |
| Both males and females can be included                                | None                                               |

|                                                       |           |
|-------------------------------------------------------|-----------|
| Must not be known to be on ART – based on self-report | If on ART |
|-------------------------------------------------------|-----------|

Table 2: Inclusion and exclusion criteria for ascertaining the primary outcome

| Inclusion criteria                                                    | Exclusion criteria                                                        |
|-----------------------------------------------------------------------|---------------------------------------------------------------------------|
| Participant must not be older than 24 years and younger than 18 years | Participants under 18 years or older than 24 years                        |
| Provide written informed consent                                      | Participants not willing to consent or unable to provide informed consent |
| Females                                                               | Males                                                                     |
| Must not be known to be currently on ART                              | Currently on ART                                                          |

Table 3: Inclusion and exclusion criteria for ascertaining the secondary outcome

| Inclusion criteria                                                    | Exclusion criteria                                                        |
|-----------------------------------------------------------------------|---------------------------------------------------------------------------|
| Participant must not be older than 30 years and younger than 18 years | Participants under 18 years or older than 30 years                        |
| Provide written informed consent                                      | Participants not willing to consent or unable to provide informed consent |
| Must not be known to be currently on ART                              | Currently on ART                                                          |

### Randomisation

We defined cluster as a pair of peer navigator who live in a same area (Izigodi). All areas in the Southern Population Intervention Platform (PIPSA) of the research locality were selected. Peer navigators were pre-assigned to 24 areas before the randomisation process. Using data from our recent DREAMS (combination HIV prevention) Impact Evaluation study nested within PIPSA, a restricted randomisation was applied to get balanced covariates (location, HIV testing prevalence and uptake of DREAMS combination HIV prevention by adolescent girls and young women) across the 3 arms. We generated a random set of possible 100,000 allocation options. After applying all 3 restrictions, a total of 47, 924 possible allocations remained, and a random number was generated and assigned to each allocation option. The random numbers were ranked from lowest to highest and the allocation option with the first rank was then selected. A randomisation list with intervention arms named alphabetically (A, B & C) was generated.

Following the statistical randomisation, a public randomisation was conducted where peer navigators were divided into three groups (A, B & C). Each group had 16 allocated PNs and 3 floating ones. Each group chose a suitable name and a leader who represented them. Group leads picked a concealed number to determine the order of picking their study arm from a box. The facilitator shook the box so to make sure that each concealed arm in the box had an equal chance of being picked. Lastly, the leaders were asked to open and announce the arms of their respective groups to the bigger group.

### Blinding

The statistician and clinical staff did not participate in the public randomisation with peer navigators and they will remain blinded until the results of the study have been finalised.

### Sample size calculations

Based on 2017 data, we estimated ~500 age eligible 18-30 years olds live in each peer navigator team catchment area, of whom we anticipated at least 200, 18-24-year-old females will be handed a study pack (so cluster size at least 200). We estimated this based on 2 peer navigators working approximately 1000 hours over the study period per cluster. We estimated that they would reach 2 young adults per each 4 hour of work and at least one would accept a study pack. We calculated the sample size calculation using the primary outcome, the rate of linkage after 90 days among women ages 18-24 years. Using our existing data on uptake of HIV testing in the DREAMS interventions as well as our data on uptake of testing and linkage to HIV care in the demographic surveillance rounds of, we estimated that 1 woman would link per 6 months of peer navigators outreach work time in the standard of care. With 8 peer educator pairs (or clusters) per arm and a cluster coefficient of variation (k) of 0.25, we will have 80% power to detect a 100% increase in rate from 1 woman to 2 women per 6 months of follow-up, and 90% power to detect a 150% increase from 1 woman to 2.5 women per 6 months of follow-up. We have chosen policy and clinically relevant increases in linkage to care. Assuming additional clustering of the outcome within peer educators and increasing the coefficient of variation (k) to 0.35, we have 80% power to detect a 150% increase in rate from 1 woman to 2.5 women per 6 months of follow-up. All sample size calculations assume two-tailed statistical tests with  $\alpha=0.05$ .

### Outcomes

The long-term goal of the intervention is to increase knowledge of HIV status and improve linkage to HIV care or prevention services such as PrEP amongst young women aged 18-24 years. A number of primary and secondary measures have been defined a priori. An interim analysis of the primary outcome will be conducted at 3 months.

#### Primary outcome:

The primary outcome is the difference between the rate of linkage of 18-24-year-old women to HIV confirmatory HIV testing, ART (if HIV positive) or PrEP counselling (if HIV negative). The rate is defined as the number of linkages per month of peer navigator outreach activities. The numerator is defined as the number of young women aged 18-24 who attend clinic for confirmatory HIV testing, PrEP counselling or ART, following HIV-ST distribution or peer navigator referral to HIV testing, treatment and prevention services. The denominator for intention-to-treat analysis (ITT) is the entire time (study duration) spent by peer navigators doing their peer outreach work. For the on-treatment analysis, we will use the actual time spent by peer navigators on distributing packs in each arm. The time worked by each peer navigator within a pair will be combined to get the total time per pair of peer navigator. The difference in rate of linkage between the study arms will be calculated - incentivised HIVST delivery through peer network and direct distribution of HIVST will be compared to standard of care.

#### Secondary outcomes:

The following calculations are planned for the secondary outcomes:

- Comparison of the difference per study arm of the total number of linkages (AGYW aged 18-24) per 100 clinic referral slips distributed.
- Comparison of the difference per study arm of the total number of linkages in men and women aged 18-30 per peer navigator outreach month.

- The change in proportion of young people aged 18-24 years who are aware of HIVST and who have used HIVST over time.
- Comparison of the difference per study area in the proportion of 18-24-year olds who report knowledge of HIV status and uptake of ART, PrEP and voluntary medical male circumcision (VMMC) in the surveillance area.
- The proportion of hard-to-reach adolescent girls and young women (aged 18-24 years) linked to care in the three arms of study.

### **Process evaluation**

Our aim is to assess the acceptability, feasibility, and fidelity of the peer delivery model in each arm in facilitating linkage to care. We compare the pattern of recruitment per arm and assess the proportion of hard-to-reach AGYW (aged 18-24 years) - defined as out of school, recently migrated and those who live in remote areas linked to care in the three study arms. We also explore potential unintended consequences and ethical issues that arise during peer referral and HIVST and ascertain what works for whom and when to be able to modify the intervention to improve equitable reach and coverage. Specifically, we explore the reach of network recruitment compared to peer outreach work, in terms of reaching more vulnerable groups (out of school, recently migrated, and those who live more remotely). Entrenched in realist evaluation, this process evaluation uses a mixed method approach to investigate implementation, mechanisms of impact and contextual factors, informed by the United Kingdom medical research council (MRC) guide<sup>38</sup> and wider implementation science literature with a focus on fidelity, reach and acceptability<sup>39</sup>.

### **Cost-effectiveness evaluation**

We compare the costs in intervention and control arms. Cost per case linked to PrEP eligibility assessment (HIV-) and cost per case started on ART (HIV+). To establish costs, we are using both a bottom-up ingredient-based costing approach and a top-down costing approach using the study budgets and expenditure reports. Specifically, we calculate and cost the actual time spent by peer-navigators in each arm for each person linked to care and prevention.

### **Data Collection**

Participant Survey and Clinic Linkage:

A short survey is administered to consenting individuals participating in the study. The questionnaire collects data on participant's demographic information and voucher identification. The data is captured on REDCap on a tablet. The survey takes approximately 5 minutes to complete and is administered in both English and isiZulu. The primary outcome of linkage is measured through identifying the consenting eligible young women who link to care through the 11 PHCs and the mobile clinics. We use an algorithm to identify which arm the individual came from, including the barcode on the referral slip they bring, the colour of the referral slips or HIVST pack, their area of residence, and the identity of the peer-navigator that recruited them.

Programmatic Data:

In addition to the survey, we collect the programme data records from the peer navigators daily reporting of their outreach activities. This includes the number of young people they have counselled and the numbers they have referred to services and the brief service recipient data they have collected on those

1  
2  
3 who have received referral slips or HIVST packs. We use the programme data in an aggregate way  
4 (disaggregated only by gender) to understand the reach and coverage of the programme and compare  
5 that with those who link to care. We also use data on changes in self-reported HIVST and linkage services  
6 collected through the population intervention surveillance platform.  
7  
8

#### 9 Participant in-depth interviews (IDIs):

10 IDIs are being conducted with the peer navigators (n= 30), clinical team (n= 6) stationed in clinics in the  
11 participating communities and a purposive sample of young women aged 18-24 years (including young  
12 men n= 45; 30 females, 15 males) in participating communities and clinics. The interviews are conducted  
13 by trained social scientists fluent in English and isiZulu and take approximately 60 minutes in length  
14 depending on the participant's responses, and this enables the researchers to understand, contextualize  
15 and explore some of the issues emanating from the trial. The small number of IDI participants in  
16 qualitative study is allowed since deeper meanings of concepts and thematic areas are explored. To limit  
17 disturbances and ensure privacy, the IDIs are conducted in a private space suitable for the participant,  
18 and audio recorded with interviewees' consents. Prior to the interview, participants are encouraged to  
19 use pseudo names instead of their real names.  
20  
21  
22  
23

#### 24 **Adverse events reporting**

25  
26 HIV testing, including HIVST, is well established and known to have a high level of safety. However,  
27 harmful reactions can occur. Adverse events (AE) related to HIVST include all undesirable experiences  
28 that result directly from use of the HIVST kit itself or as a reaction from others due to the presence of  
29 the kit, use of the kit or results produced from the kit. AEs can be from one person to another, or a  
30 person to themselves, and can occur before, during or after self-testing. Also, during PrEP resupply  
31 and monitoring visits, participants complete a standardised symptom screening questionnaire for  
32 adverse effects of PrEP as per South African clinical guidelines. Furthermore, all participants will  
33 receive regular creatinine tests to monitor their renal function. Participants who have severe (grade  
34 3/4) adverse effects and serious adverse effects, are referred to the study clinician for medical  
35 evaluation. All participants who experience adverse events receive follow-up until the adverse event  
36 is resolved.  
37  
38  
39  
40

41 AEs and Serious Adverse Events (SAE) are captured through the process evaluation and community  
42 engagement units and the telephone hotline. In addition, peer navigators and clinic staff log AEs using  
43 our incident reporting form for up to 12 months after the start of the intervention. Reported AEs  
44 and SAEs are monitored, categorised based on an established grading system. SAEs are logged, with  
45 the Principal Investigator to evaluate the SAE for seriousness and likely relationship to the  
46 intervention. Related SAEs are reported to UKZN and LSHTM Ethics Review Boards. All SAEs are  
47 reported regularly through six-month progress reports to TAG members, local and international  
48 collaborators. Annual reports with full listings of SAEs will be submitted to Ethics Review Boards.  
49  
50  
51  
52  
53  
54  
55  
56  
57  
58  
59  
60



### Statistical Analysis

The analysis of primary outcome follows an intention-to-treat (ITT) and per-protocol approaches. The analysis of secondary outcomes will be undertaken using per-protocol approach only. Since we randomised the pairs of peer navigator (clusters), the rate of linkage will be calculated for each pair of peer navigator using aggregate data for each cluster. All analyses will be performed using STATA version 15 (StataCorp LP, College Station, Texas USA). In the unadjusted analysis, the mean difference in linkage rate between each intervention arm and standard of care will be assessed using t-test and 95% confidence intervals will be calculated. No adjusted analysis is planned. As part of the exploratory analysis, we will perform a (i) subgroup analysis by gender and area and (ii) two intervention arms will be compared to one another (incentivised HIVST delivery through peer network approach will also be compared to direct distribution of HIVST approach). To expand on this, the data from the client survey captured on REDCap dashboard will be exported into STATA, cleaned and analysed. Descriptive analysis will be performed. Identified variables captured via programmatic monitoring tool will also be exported from the surveillance platform and analysed using STATA to compare data and linkage to care. We will use standard methods for the analysis of cluster randomised trials with small numbers of clusters<sup>40</sup>, and reporting will conform to CONSORT guidance for cluster randomised trials<sup>41,42</sup>. Cluster-level summary rates will be calculated and used to estimate the unadjusted rate ratio. Rate ratios adjusting for substantial imbalances in population across arms will also be calculated using a two-stage process. Substantial differences will be identified by comparing frequencies or means of variables known to be associated with the primary outcome. These will be assessed by investigators without the use of statistical tests.

### Qualitative analysis

Nvivo software will be used for categorisation and coding of emerging themes from the interview transcripts. Identified themes (including participants' quotes) and interview transcripts will be reviewed and compared by the research team for inconsistencies and adequate representation of participants' views. Emerging themes that address the key focus of the study will be examined and analysed following an interpretivist approach<sup>43</sup>.

### Data management

Quantitative data are collected directly on the study tablet via REDCap database and resides within a single MySQL database server within a secure server cluster. Study-specific electronic laboratory results are transferred directly to a secured server for storage. Qualitative data are stored in the form of Word files or in Excel both of which can be uploaded into Nvivo qualitative data management programme. The use of MS Word will ensure that data can in future be shared for use in different analysis programmes. These files will be kept on a secure access-controlled folder on a secured server. Qualitative audio files will be destroyed once they have been transcribed, translated and quality controlled.

### Patient and public involvement

Although we did not involve patients or the public in the design of the study, findings from previous studies conducted within the community were useful during the study design phase. The study was also presented to the community advisory board (CAB) and the district department of health for comments before it was submitted to IRBs for ethics approval. The results of the study will be shared with the peer



1  
2  
3 navigators and the research community through community dialogues and the community advisory  
4 board.  
5  
6  
7  
8  
9  
10  
11

12 **Fig 3: Peer Navigators community outreach workflow.**  
13  
14  
15  
16  
17

18 **Fig 4: Mobile/Fixed clinics service workflow**  
19  
20  
21  
22  
23

## 24 **ETHICS AND DISSEMINATION**

### 25 **Ethical consideration: confidentiality and informed consent**

26  
27  
28 All staff (including peer navigators) have been provided with training on research ethics such as  
29 confidentiality, voluntary participation and good clinical practices. Anonymity and confidentiality are  
30 ensured at all levels of the research process, and none of our reports, presentations or articles contain  
31 study participants identifying information. Pseudonyms are used when reporting the data particularly  
32 qualitative data. Each participant is assigned a unique non-identifying participant identification number.  
33 Prior to their involvement in the study, participants are provided with adequate information about the  
34 study and are allowed to ask questions for clarifications. Voluntary informed consent is collected only if  
35 participants have the full understanding of the study procedures. A copy of the signed consent form is  
36 given to them. Participants are informed about the importance of the confirmatory diagnostic testing. An  
37 anonymous support hotline is provided on the referral slips should they need to discuss their HIV status,  
38 counselling and further linkage to HIV care or other health services. All participant irrespective of their  
39 consent to participating in the study are eligible for the clinical services provided through the study. The  
40 study was approved by and conforms to the ethical guidelines and standards of UKZN, LSHTM and WHO.  
41  
42  
43  
44

### 45 **Dissemination plan**

46  
47 The results of this study will be disseminated through traditional academic channels (peer reviewed  
48 journal publications) as well as on different information dissemination platforms such as conferences,  
49 workshops, community meetings and symposia. The results of the study will also be presented at Self-  
50 Testing Africa (STAR) consortium meetings and will be included in the WHO guidelines. The results of the  
51 study will be shared with the peer navigators and the research community through community dialogues  
52 and the AHRI community advisory board. A detailed findings report will be shared with the Department  
53 of Health and other stakeholders to inform policy.  
54  
55  
56  
57  
58  
59  
60

## DISCUSSION

Despite the burden of HIV and the availability of free HIV testing and treatment in our local PHCs, HIV status knowledge remains low amongst young people < 30 years<sup>2</sup>. Several complex barriers (e.g. stigma, confidentiality, family rejection, waiting times and lack of youth friendly services etc.) impeding on young people's access to HIV care services were identified in a formative research we completed in 2018<sup>2</sup>. Studies including systematic reviews<sup>13,17</sup> have shown HIVST to be a promising alternative HIV testing option because it is private, flexible and an efficient method. However, there is limited evidence on the use of HIVST to improve linkage to prevention such as PrEP. The overarching goal of this trial is to address the gap in HIV testing and linkage to HIV prevention among young women aged 18-24 years. This goal will be achieved through the assessment of two HIVST delivery models (incentivized peer network versus direct distribution by peer navigators) compared to the standard of care of peer navigator only.

A major strength of this study is the development of a theoretically derived intervention that can be implemented through existing cadre of community caregivers and peer to peer networks across SSA<sup>44-47</sup>. If found to be effective in increasing HIV testing uptake and prevention, the intervention is designed to be rolled out. Also, using a rigorous cost effectiveness analysis will allow SA policy makers to evaluate the cost-benefit ratio of using the different models of distribution in different settings. Furthermore, by collecting rigorous data on linkage to prevention both through the trial and from our surveillance infrastructure, we can understand the potential population impact of the different methods of HIVST distribution on knowledge of status and linkage to care and prevention. Ultimately this will provide evidence of the potential of the intervention to attract young people into the HIV care and prevention cascade and inform the evidence base to reduce the mortality and morbidity in youth. Lastly, rigorous process evaluation and collection of data on all adverse events and social harms will provide important data around some of the concerns about HIVST, i.e. the potential for coercive test, depression, anxiety, suicidality or intimate partner violence.

In order to reduce the risk of contamination due to the proximity of the areas and the nature of the intervention, we have piloted several methods including the use of referral slips with unique codes and colour coordinated packs to identify the arm individuals come from when they link to care. Previous data from nested cohorts that we have followed up in our area has shown that young people rarely migrate within our surveillance area given that only 220 of 2 184 young people < 25 years cohorts moved from one cluster to another in 2017/2018. Furthermore, the process evaluation will help us understand the delivery model in each arm as well as unintended consequences and ethical issues that arise during the study and ascertain what works for whom and when to be able to modify the intervention to improve equitable reach and coverage.

In conclusion, the results of this trial are expected to contribute to WHO guidelines and informed policy aimed at implementation and scale-up of HIVST and PrEP in South Africa. Also, this study will address critical gaps in the literature on HIV testing and prevention interventions for young people particularly females aged 18-24 years in Southern Africa.

### Acknowledgements:

The authors acknowledge TAG of the STAR initiative and AHRI HIV Prevention Multilevel Group including the research assistants, peer navigators, clinical team, managers and research administrators for their

1  
2  
3 commitment to the study. We also extend our appreciation to our research community including the  
4 community advisory boards in uMkhanyakude district.  
5  
6

#### 7 **Authors Contributions:**

8  
9 MS and LC conceived the study. OA, MS, CH, JD, JS, LC, FC, NC, NO, PM, MTN MN designed the study. OA  
10 and MS wrote the first draft of the manuscript. OA, MS, LC, JS, JD, CH, TS, FC, MN, NC, KH, CJ, PM, MTN,  
11 and NO read and critically revised the manuscript. All authors read and approved the final manuscript.  
12  
13

#### 14 **Funding:**

15 This study is part of the Self-Testing Africa (STAR) initiative funded by the Unitaaid (grant number:  
16 PO#10140-0-600). MS is partly supported by the US National Institute of Health (NIH) R01 (award no:  
17 5R01MH114560-03) that supports a peer led outreach team of navigators to support uptake and retention  
18 of adolescents and young adults in existing HIV prevention. Africa Health Research Institute is supported  
19 by core funding from the Wellcome Trust [Core grant number (082384/Z/07/Z)]. The funders were not  
20 involved in the design of the study.  
21  
22

#### 23 **Competing interests:**

24 None declared.  
25  
26  
27

#### 28 **Ethics approval:**

29  
30 Ethical approval was obtained for the study from Institutional Review Boards (IRB) of the World Health  
31 Organisation, Switzerland (**Protocol ID: STAR CRT, South Africa**), London School of Hygiene and Tropical  
32 Medicine, UK (**Reference no: 15990 - 1**), University of KwaZulu-Natal (**BFC311/18**), and the KwaZulu-Natal  
33 Department of Health (**NHRD Reference no: KZ\_201901\_012**), South Africa. The study was also approved  
34 by the community advisory board (CAB) representing the research community before it was submitted to  
35 IRBs. **Trial registration number:** Clinicaltrials.gov - NCT03751826. Protocol date: 17 January 2019.  
36  
37

#### 38 **Data sharing statement:**

39 On completion of the trial, de-identified data will be available through the Africa Health Research Institute,  
40 South Africa (AHRI) data access repository upon request. Requests for data sharing are reviewed by the  
41 data custodian and a Data Sharing committee at AHRI. After approval, all data sharing, even those without  
42 identifiers, will be through a secure and password-controlled data sharing site, with access strictly limited  
43 to transcripts that are relevant to the analysis planned. Users will be asked to abide by the AHRI Data  
44 Access and Sharing Policy.  
45  
46  
47  
48  
49  
50  
51  
52  
53  
54  
55  
56  
57  
58  
59  
60

1  
2  
3  
4  
5  
6  
7  
8  
9  
10  
11  
12  
13  
14  
15  
16  
17  
18  
19  
20  
21  
22  
23  
24  
25  
26  
27  
28  
29  
30  
31  
32  
33  
34  
35  
36  
37  
38  
39  
40  
41  
42  
43  
44  
45  
46  
47  
48  
49  
50  
51  
52  
53  
54  
55  
56  
57  
58  
59  
60

## REFERENCES

1. HSRC. *South African National HIV Prevalence, Incidence, Behaviour and Communication Survey 2017*. Pretoria, South Africa: Human Science Research Council July, 2018 2018.
2. Adeagbo O, Herbst C, Dlamini N, et al. The 'Missing Middle' in HIV Treatment Cascade: Ensuring Men's and Young People's access to HIV Care in KwaZulu-Natal, South Africa. Association of Social Science and Humanities in HIV , 2018 International AIDS Society Pre-conference 21 July 2018, 2018; Amsterdam.
3. Huerga H, Van Cutsem G, Farhat JB, et al. Progress towards the UNAIDS 90–90–90 goals by age and gender in a rural area of KwaZulu-Natal, South Africa: a household-based community cross-sectional survey. *BMC public health*. 2018;18(1):303.
4. Carrasco MA, Fleming P, Wagman J, Wong V. Toward 90-90-90: identifying those who have never been tested for HIV and differences by sex in Lesotho. *AIDS care*. 2018;30(3):284-288.
5. Organization WH. WHO expands recommendation on oral preexposure prophylaxis of HIV infection (PrEP): Policy brief. *WHO, Geneva*. 2015.
6. (NDoH) NDoHSA. *National Policy on HIV Pre Exposure Prophylaxis (PrEP) and test and treat (T&T)*. Pretoria, South Africa 2016.
7. M S, N C, N M, et al. Persistently high incidence of HIV in adolescent girls and young women in rural KwaZulu-Natal, South Africa: Lessons for Determined Resilient, Empowered, AIDS free, Mentored and Safe (DREAMS) multilevel HIV prevention scale-up. Paper presented at: AIDS Impact; 17 November 2017, 2017; Cape Town, South Africa.
8. Iwuji C, Orne-Gliemann J, Larmarange J, et al. Universal test and treat and the HIV epidemic in rural South Africa: a phase 4, open-label, community cluster randomised trial. *The lancet HIV*. 2018;5(3):e116-e125.
9. Plazy M, Farouki KE, Iwuji C, et al. Access to HIV care in the context of universal test and treat: challenges within the ANRS 12249 TasP cluster-randomized trial in rural South Africa. *Journal of the International AIDS Society*. 2016;19(1):20913.
10. Moshabela M, Zuma T, Orne-Gliemann J, et al. "It is better to die": experiences of traditional health practitioners within the HIV treatment as prevention trial communities in rural South Africa (ANRS 12249 TasP trial). *AIDS care*. 2016;28(sup3):24-32.
11. Boyer S, Iwuji C, Gosset A, et al. Factors associated with antiretroviral treatment initiation amongst HIV-positive individuals linked to care within a universal test and treat programme: early findings of the ANRS 12249 TasP trial in rural South Africa. *AIDS care*. 2016;28(sup3):39-51.
12. Spielberg F, Levine RO, Weaver M. Self-testing for HIV: a new option for HIV prevention? *The Lancet infectious diseases*. 2004;4(10):640-646.
13. Krause J, Subklew-Sehume F, Kenyon C, Colebunders R. Acceptability of HIV self-testing: a systematic literature review. *BMC public health*. 2013;13(1):735.
14. Choko AT, Desmond N, Webb EL, et al. The uptake and accuracy of oral kits for HIV self-testing in high HIV prevalence setting: a cross-sectional feasibility study in Blantyre, Malawi. *PLoS medicine*. 2011;8(10):e1001102.
15. Spielberg F, Critchlow C, Vittinghoff E, et al. Home collection for frequent HIV testing: acceptability of oral fluids, dried blood spots and telephone results. *Aids*. 2000;14(12):1819-1828.
16. Belza MJ, Rosales-Statkus ME, Hoyos J, et al. Supervised blood-based self-sample collection and rapid test performance: a valuable alternative to the use of saliva by HIV testing programmes with no medical or nursing staff. *Sex Transm Infect*. 2012;sextrans-2011-050131.

17. Harichund C, Karim QA, Kunene P, Simelane S, Moshabela M. Exploring factors that influence the integration of HIVST with HCT using a qualitative comparative cross-over design in KwaZulu-Natal, South Africa. *Global public health*. 2019;1-13.
18. Gaydos CA, Hsieh Y-H, Harvey L, et al. Will patients “opt in” to perform their own rapid HIV test in the emergency department? *Annals of emergency medicine*. 2011;58(1):S74-S78.
19. Kalibala S, Tun W, Muraah W, Cherutich P, Oweya E, Oluoch P. Knowing myself first’: feasibility of self-testing among health workers in Kenya. *Nairobi: Population Council*. 2011.
20. Lee VJ, Tan SC, Earnest A, Seong PS, Tan HH, Leo YS. User acceptability and feasibility of self-testing with HIV rapid tests. *JAIDS Journal of Acquired Immune Deficiency Syndromes*. 2007;45(4):449-453.
21. WHO. *Guidelines on HIV self-testing and partner notification*. Switzerland: WHO;2016.
22. Kapaku K, Neuman M, Maluzi K, et al. Is OraQuick HIV-self-testing valid among intended users? Analysis from a clinical performance study in Lusaka, Zambia. *International AIDS Society (IAS 2017) Paris, France*. 2017.
23. Van Damme L, Corneli A, Ahmed K, et al. Preexposure prophylaxis for HIV infection among African women. *New England Journal of Medicine*. 2012;367(5):411-422.
24. Marrazzo JM, Ramjee G, Richardson BA, et al. Tenofovir-based preexposure prophylaxis for HIV infection among African women. *New England Journal of Medicine*. 2015;372(6):509-518.
25. Yun K, Xu J-j, Zhang J, et al. Female and younger subjects have lower adherence in PrEP trials: a meta-analysis with implications for the uptake of PrEP service to prevent HIV. *Sex Transm Infect*. 2017;sextrans-2017-053217.
26. Kim S-H, Gerver SM, Fidler S, Ward H. Adherence to antiretroviral therapy in adolescents living with HIV: systematic review and meta-analysis. *AIDS (London, England)*. 2014;28(13):1945.
27. Sharma M, Barnabas RV, Celum C. Community-based strategies to strengthen men’s engagement in the HIV care cascade in sub-Saharan Africa. *PLoS medicine*. 2017;14(4):e1002262.
28. Van Rooyen H, Barnabas RV, Baeten JM, et al. High HIV testing uptake and linkage to care in a novel program of home-based HIV counseling and testing with facilitated referral in KwaZulu-Natal, South Africa. *Journal of acquired immune deficiency syndromes (1999)*. 2013;64(1):e1.
29. Kanters S, Park JJ, Chan K, et al. Interventions to improve adherence to antiretroviral therapy: a systematic review and network meta-analysis. *The Lancet HIV*. 2017;4(1):e31-e40.
30. Pettifor A, Nguyen NL, Celum C, Cowan FM, Go V, Hightow-Weidman L. Tailored combination prevention packages and PrEP for young key populations. *Journal of the International AIDS Society*. 2015;18(2S1).
31. Choko AT, MacPherson P, Webb EL, et al. One Year Outcomes Following Community-Based HIV Self-Testing: A Prospective Study in Malawi. Conference on Retroviruses and Opportunistic Infections 2014; United States.
32. Funnell SC, Rogers PJ. *Purposeful program theory: Effective use of theories of change and logic models*. Vol 31: John Wiley & Sons; 2011.
33. Hargreaves JR, Delany-Moretlwe S, Hallett TB, et al. The HIV prevention cascade: integrating theories of epidemiological, behavioural, and social science into programme design and monitoring. *Lancet HIV*. 2016;3(7):e318-322.
34. Adeagbo O, Herbst C, Dlamini N, et al. " If She Tests Negative, It Means I Am Also Negative": Men's Construction of HIV Testing in South Africa. *AIDS RESEARCH AND HUMAN RETROVIRUSES*. 2018;34:85-85.
35. Nkosi B, Seeley J, Ngwenya N, et al. Exploring adolescents and young people’s candidacy for utilising health services in a rural district, South Africa. *BMC Health Services Research*. 2019;19(1):195.

- 1  
2  
3 36. Chan A-W, Tetzlaff JM, Altman DG, et al. SPIRIT 2013 statement: defining standard protocol items  
4 for clinical trials. *Annals of internal medicine*. 2013;158(3):200-207.  
5  
6 37. Harris PA, Taylor R, Thielke R, Payne J, Gonzalez N, Conde JG. Research electronic data capture  
7 (REDCap)—a metadata-driven methodology and workflow process for providing translational  
8 research informatics support. *Journal of biomedical informatics*. 2009;42(2):377-381.  
9  
10 38. Moore GF, Audrey S, Barker M, et al. Process evaluation of complex interventions: Medical  
11 Research Council guidance. *bmj*. 2015;350:h1258.  
12  
13 39. Jacobs C, Michelo C, Moshabela M. Implementation of a community-based intervention in the  
14 most rural and remote districts of Zambia: a process evaluation of safe motherhood action groups.  
15 *Implementation science*. 2018;13(1):74.  
16  
17 40. Hayes RJ, Moulton LH. *Cluster randomised trials*. Chapman and Hall/CRC; 2017.  
18  
19 41. Campbell MK, Piaggio G, Elbourne DR, Altman DG. Consort 2010 statement: extension to cluster  
20 randomised trials. *Bmj*. 2012;345:e5661.  
21  
22 42. Campbell MK, Elbourne DR, Altman DG. CONSORT statement: extension to cluster randomised  
23 trials. *Bmj*. 2004;328(7441):702-708.  
24  
25 43. Denzin NK, Lincoln YS. *The Sage handbook of qualitative research*. Sage; 2011.  
26  
27 44. Onyango MA, Adu-Sarkodie Y, Agyarko-Poku T, et al. "It's all about making a life": poverty, HIV,  
28 violence, and other vulnerabilities faced by young female sex workers in Kumasi, Ghana. *JAIDS*  
29 *Journal of Acquired Immune Deficiency Syndromes*. 2015;68:S131-S137.  
30  
31 45. Geibel S, King'ola N, Temmerman M, Luchters S. The impact of peer outreach on HIV knowledge  
32 and prevention behaviours of male sex workers in Mombasa, Kenya. *Sex Transm Infect*.  
33 2012;88(5):357-362.  
34  
35 46. Oldenburg CE, Biello KB, Colby D, et al. Engagement with peer health educators is associated with  
36 willingness to use pre-exposure prophylaxis among male sex workers in Ho Chi Minh City,  
37 Vietnam. *AIDS patient care and STDs*. 2014;28(3):109-112.  
38  
39 47. Ford K, Wirawan D, Suastina W, Reed B, Muliawan P. Evaluation of a peer education programme  
40 for female sex workers in Bali, Indonesia. *International journal of STD & AIDS*. 2000;11(11):731-  
41 733.  
42  
43  
44  
45  
46  
47  
48  
49  
50  
51  
52  
53  
54  
55  
56  
57  
58  
59  
60



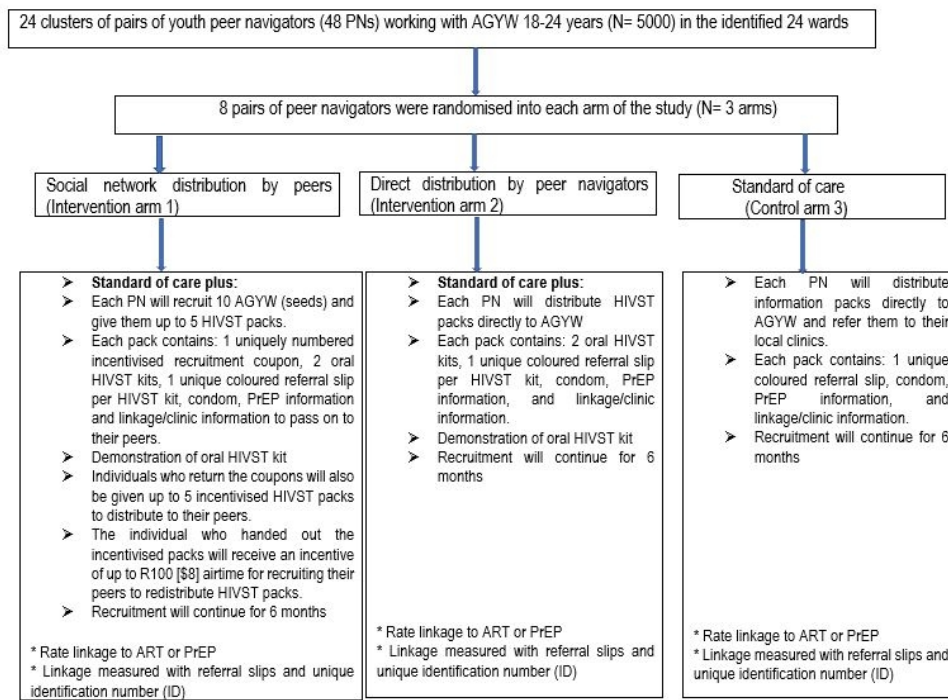

Figure1\_300

66x48mm (300 x 300 DPI)



1  
2  
3  
4  
5  
6  
7  
8  
9  
10  
11  
12  
13  
14  
15  
16  
17  
18  
19  
20  
21  
22  
23  
24  
25  
26  
27  
28  
29  
30  
31  
32  
33  
34  
35  
36  
37  
38  
39  
40  
41  
42  
43  
44  
45  
46  
47  
48  
49  
50  
51  
52  
53  
54  
55  
56  
57  
58  
59  
60

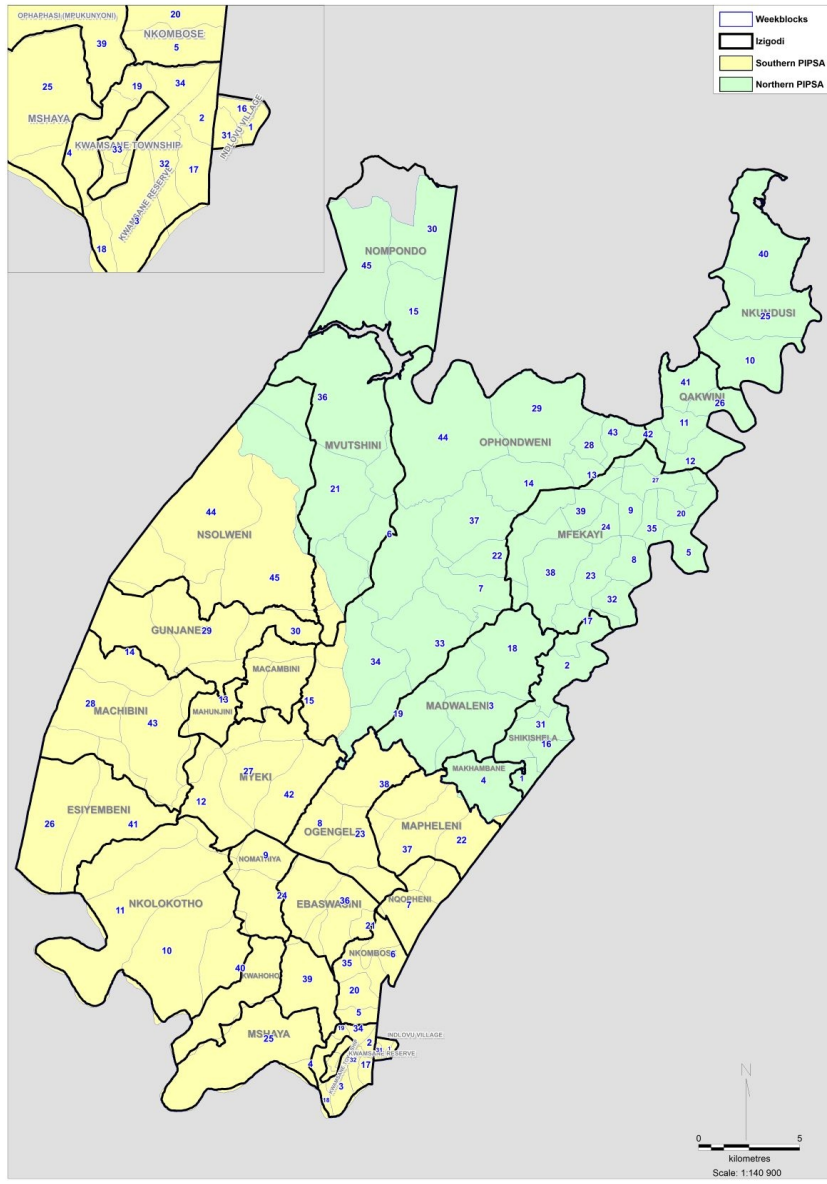

Figure 2\_PIPSA\_300

100x142mm (300 x 300 DPI)

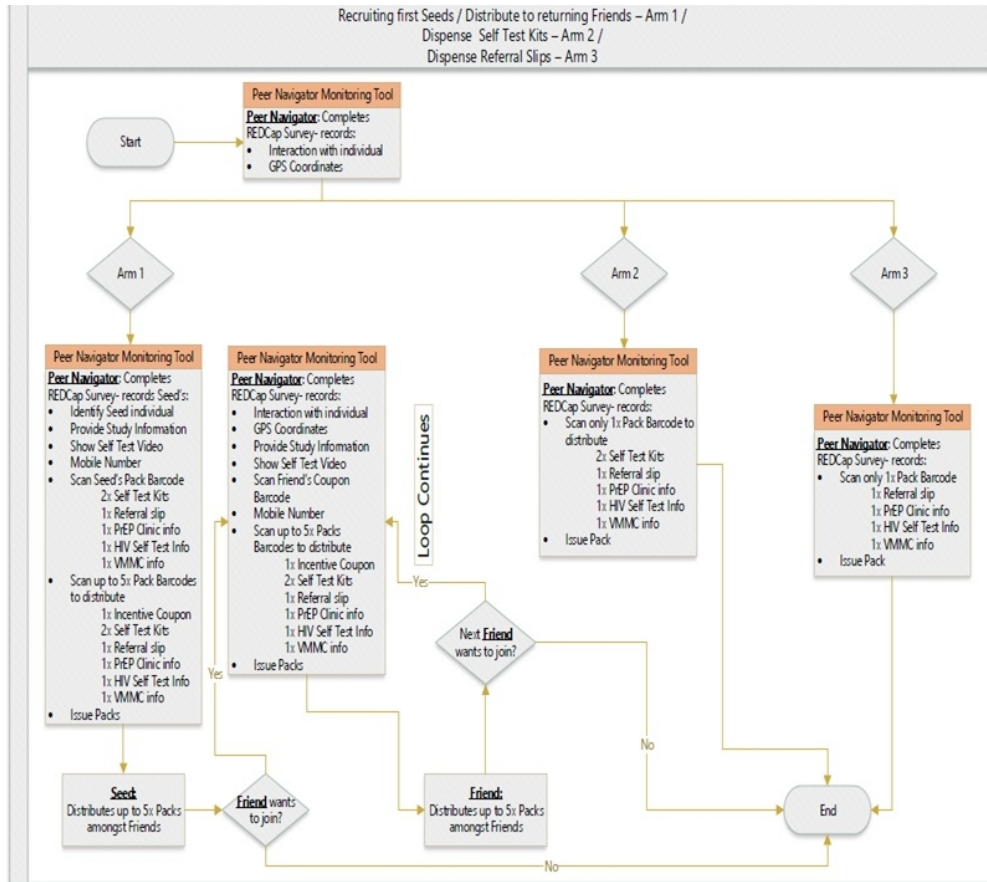

Fig3PeerNav\_Process\_300

68x59mm (300 x 300 DPI)

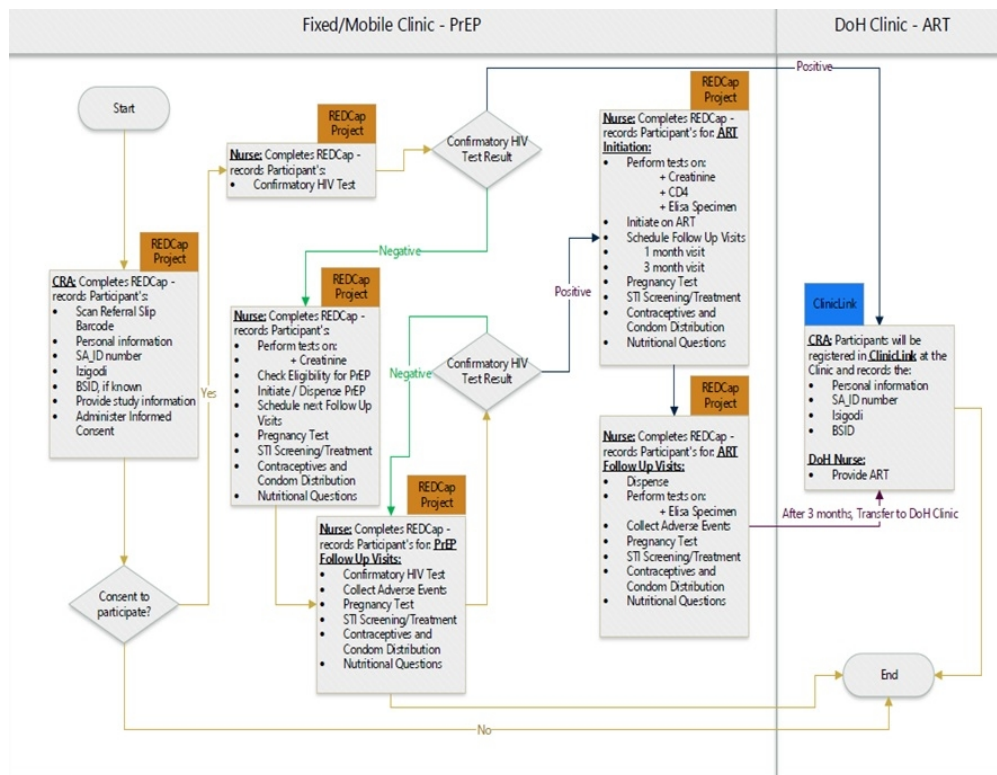

Fig4Mobileclinic\_Process\_300

75x58mm (300 x 300 DPI)

# Reporting checklist for protocol of a clinical trial.

Based on the SPIRIT guidelines.

## Instructions to authors

Complete this checklist by entering the page numbers from your manuscript where readers will find each of the items listed below.

Your article may not currently address all the items on the checklist. Please modify your text to include the missing information. If you are certain that an item does not apply, please write "n/a" and provide a short explanation.

Upload your completed checklist as an extra file when you submit to a journal.

In your methods section, say that you used the SPIRIT reporting guidelines, and cite them as:

Chan A-W, Tetzlaff JM, Altman DG, Laupacis A, Gøtzsche PC, Krleža-Jerić K, Hróbjartsson A, Mann H, Dickersin K, Berlin J, Doré C, Parulekar W, Summerskill W, Groves T, Schulz K, Sox H, Rockhold FW, Rennie D, Moher D. SPIRIT 2013 Statement: Defining standard protocol items for clinical trials. *Ann Intern Med.* 2013;158(3):200-207

|                                   | Reporting Item                                                                                                                  | Page Number |
|-----------------------------------|---------------------------------------------------------------------------------------------------------------------------------|-------------|
| <b>Administrative information</b> |                                                                                                                                 |             |
| Title                             | <a href="#">#1</a> Descriptive title identifying the study design, population, interventions, and, if applicable, trial acronym | 1           |

|    |                    |                     |                                                        |                 |
|----|--------------------|---------------------|--------------------------------------------------------|-----------------|
| 1  | Trial registration | <a href="#">#2a</a> | Trial identifier and registry name. If not yet         | 2               |
| 2  |                    |                     | registered, name of intended registry                  |                 |
| 3  |                    |                     |                                                        |                 |
| 4  |                    |                     |                                                        |                 |
| 5  |                    |                     |                                                        |                 |
| 6  |                    |                     |                                                        |                 |
| 7  |                    | <a href="#">#2b</a> | All items from the World Health Organization Trial     | (see below for  |
| 8  |                    |                     | Registration Data Set                                  | specific items) |
| 9  |                    |                     |                                                        |                 |
| 10 |                    |                     |                                                        |                 |
| 11 |                    |                     |                                                        |                 |
| 12 | Protocol version   | <a href="#">#3</a>  | Date and version identifier                            | 2               |
| 13 |                    |                     |                                                        |                 |
| 14 |                    |                     |                                                        |                 |
| 15 | Funding            | <a href="#">#4</a>  | Sources and types of financial, material, and other    | 17              |
| 16 |                    |                     | support                                                |                 |
| 17 |                    |                     |                                                        |                 |
| 18 |                    |                     |                                                        |                 |
| 19 |                    |                     |                                                        |                 |
| 20 | Roles and          | <a href="#">#5a</a> | Names, affiliations, and roles of protocol             | 1, 17           |
| 21 | responsibilities:  |                     | contributors                                           |                 |
| 22 |                    |                     |                                                        |                 |
| 23 | contributorship    |                     |                                                        |                 |
| 24 |                    |                     |                                                        |                 |
| 25 |                    |                     |                                                        |                 |
| 26 |                    |                     |                                                        |                 |
| 27 |                    |                     |                                                        |                 |
| 28 | Roles and          | <a href="#">#5b</a> | Name and contact information for the trial sponsor     | 17              |
| 29 | responsibilities:  |                     |                                                        |                 |
| 30 |                    |                     |                                                        |                 |
| 31 | sponsor contact    |                     |                                                        |                 |
| 32 |                    |                     |                                                        |                 |
| 33 | information        |                     |                                                        |                 |
| 34 |                    |                     |                                                        |                 |
| 35 |                    |                     |                                                        |                 |
| 36 |                    |                     |                                                        |                 |
| 37 |                    |                     |                                                        |                 |
| 38 | Roles and          | <a href="#">#5c</a> | Role of study sponsor and funders, if any, in study    | 17              |
| 39 | responsibilities:  |                     | design; collection, management, analysis, and          |                 |
| 40 |                    |                     | interpretation of data; writing of the report; and the |                 |
| 41 | sponsor and funder |                     | decision to submit the report for publication,         |                 |
| 42 |                    |                     | including whether they will have ultimate authority    |                 |
| 43 |                    |                     | over any of these activities                           |                 |
| 44 |                    |                     |                                                        |                 |
| 45 |                    |                     |                                                        |                 |
| 46 |                    |                     |                                                        |                 |
| 47 |                    |                     |                                                        |                 |
| 48 |                    |                     |                                                        |                 |
| 49 |                    |                     |                                                        |                 |
| 50 |                    |                     |                                                        |                 |
| 51 |                    |                     |                                                        |                 |
| 52 | Roles and          | <a href="#">#5d</a> | Composition, roles, and responsibilities of the        | N/A             |
| 53 | responsibilities:  |                     | coordinating centre, steering committee, endpoint      |                 |
| 54 |                    |                     | adjudication committee, data management team,          |                 |
| 55 | committees         |                     |                                                        |                 |
| 56 |                    |                     |                                                        |                 |
| 57 |                    |                     |                                                        |                 |
| 58 |                    |                     |                                                        |                 |
| 59 |                    |                     |                                                        |                 |
| 60 |                    |                     |                                                        |                 |

and other individuals or groups overseeing the trial,  
if applicable (see Item 21a for data monitoring  
committee)

## Introduction

|                                                  |                     |                                                                                                                                                                                                            |     |
|--------------------------------------------------|---------------------|------------------------------------------------------------------------------------------------------------------------------------------------------------------------------------------------------------|-----|
| Background and rationale                         | <a href="#">#6a</a> | Description of research question and justification for undertaking the trial, including summary of relevant studies (published and unpublished) examining benefits and harms for each intervention         | 2-3 |
| Background and rationale: choice of comparators  | <a href="#">#6b</a> | Explanation for choice of comparators                                                                                                                                                                      | N/A |
| Objectives                                       | <a href="#">#7</a>  | Specific objectives or hypotheses                                                                                                                                                                          | 4   |
| Trial design                                     | <a href="#">#8</a>  | Description of trial design including type of trial (eg, parallel group, crossover, factorial, single group), allocation ratio, and framework (eg, superiority, equivalence, non-inferiority, exploratory) | 4-5 |
| <b>Methods:</b>                                  |                     |                                                                                                                                                                                                            |     |
| <b>Participants, interventions, and outcomes</b> |                     |                                                                                                                                                                                                            |     |
| Study setting                                    | <a href="#">#9</a>  | Description of study settings (eg, community clinic, academic hospital) and list of countries where data                                                                                                   | 6   |

|    |                      |                                                                             |       |
|----|----------------------|-----------------------------------------------------------------------------|-------|
| 1  |                      | will be collected. Reference to where list of study                         |       |
| 2  |                      | sites can be obtained                                                       |       |
| 3  |                      |                                                                             |       |
| 4  |                      |                                                                             |       |
| 5  |                      |                                                                             |       |
| 6  | Eligibility criteria | <a href="#">#10</a> Inclusion and exclusion criteria for participants. If   | 8-9   |
| 7  |                      | applicable, eligibility criteria for study centres and                      |       |
| 8  |                      | individuals who will perform the interventions (eg,                         |       |
| 9  |                      | surgeons, psychotherapists)                                                 |       |
| 10 |                      |                                                                             |       |
| 11 |                      |                                                                             |       |
| 12 |                      |                                                                             |       |
| 13 |                      |                                                                             |       |
| 14 |                      |                                                                             |       |
| 15 |                      |                                                                             |       |
| 16 | Interventions:       | <a href="#">#11a</a> Interventions for each group with sufficient detail to | 5-6   |
| 17 |                      | allow replication, including how and when they will                         |       |
| 18 | description          | be administered                                                             |       |
| 19 |                      |                                                                             |       |
| 20 |                      |                                                                             |       |
| 21 |                      |                                                                             |       |
| 22 |                      |                                                                             |       |
| 23 | Interventions:       | <a href="#">#11b</a> Criteria for discontinuing or modifying allocated      | N/A   |
| 24 |                      | interventions for a given trial participant (eg, drug                       |       |
| 25 | modifications        | dose change in response to harms, participant                               |       |
| 26 |                      | request, or improving / worsening disease)                                  |       |
| 27 |                      |                                                                             |       |
| 28 |                      |                                                                             |       |
| 29 |                      |                                                                             |       |
| 30 |                      |                                                                             |       |
| 31 |                      |                                                                             |       |
| 32 |                      |                                                                             |       |
| 33 | Interventions:       | <a href="#">#11c</a> Strategies to improve adherence to intervention        | N/A   |
| 34 |                      | protocols, and any procedures for monitoring                                |       |
| 35 | adherence            | adherence (eg, drug tablet return; laboratory tests)                        |       |
| 36 |                      |                                                                             |       |
| 37 |                      |                                                                             |       |
| 38 |                      |                                                                             |       |
| 39 |                      |                                                                             |       |
| 40 |                      |                                                                             |       |
| 41 | Interventions:       | <a href="#">#11d</a> Relevant concomitant care and interventions that       | N/A   |
| 42 |                      | are permitted or prohibited during the trial                                |       |
| 43 | concomitant care     |                                                                             |       |
| 44 |                      |                                                                             |       |
| 45 |                      |                                                                             |       |
| 46 | Outcomes             | <a href="#">#12</a> Primary, secondary, and other outcomes, including       | 10-11 |
| 47 |                      | the specific measurement variable (eg, systolic                             |       |
| 48 |                      | blood pressure), analysis metric (eg, change from                           |       |
| 49 |                      | baseline, final value, time to event), method of                            |       |
| 50 |                      | aggregation (eg, median, proportion), and time                              |       |
| 51 |                      | point for each outcome. Explanation of the clinical                         |       |
| 52 |                      |                                                                             |       |
| 53 |                      |                                                                             |       |
| 54 |                      |                                                                             |       |
| 55 |                      |                                                                             |       |
| 56 |                      |                                                                             |       |
| 57 |                      |                                                                             |       |
| 58 |                      |                                                                             |       |
| 59 |                      |                                                                             |       |
| 60 |                      |                                                                             |       |



|    |                           |                                                                        |     |
|----|---------------------------|------------------------------------------------------------------------|-----|
| 1  |                           | relevance of chosen efficacy and harm outcomes                         |     |
| 2  |                           |                                                                        |     |
| 3  |                           | is strongly recommended                                                |     |
| 4  |                           |                                                                        |     |
| 5  |                           |                                                                        |     |
| 6  | Participant timeline      | <a href="#">#13</a> Time schedule of enrolment, interventions          | 7-8 |
| 7  |                           | (including any run-ins and washouts),                                  |     |
| 8  |                           | assessments, and visits for participants. A                            |     |
| 9  |                           | schematic diagram is highly recommended (see                           |     |
| 10 |                           |                                                                        |     |
| 11 |                           | Figure)                                                                |     |
| 12 |                           |                                                                        |     |
| 13 |                           |                                                                        |     |
| 14 |                           |                                                                        |     |
| 15 |                           |                                                                        |     |
| 16 |                           |                                                                        |     |
| 17 |                           |                                                                        |     |
| 18 | Sample size               | <a href="#">#14</a> Estimated number of participants needed to         | 10  |
| 19 |                           | achieve study objectives and how it was                                |     |
| 20 |                           | determined, including clinical and statistical                         |     |
| 21 |                           | assumptions supporting any sample size                                 |     |
| 22 |                           | calculations                                                           |     |
| 23 |                           |                                                                        |     |
| 24 |                           |                                                                        |     |
| 25 |                           |                                                                        |     |
| 26 |                           |                                                                        |     |
| 27 |                           |                                                                        |     |
| 28 |                           |                                                                        |     |
| 29 |                           |                                                                        |     |
| 30 | Recruitment               | <a href="#">#15</a> Strategies for achieving adequate participant      | 7-8 |
| 31 |                           | enrolment to reach target sample size                                  |     |
| 32 |                           |                                                                        |     |
| 33 |                           |                                                                        |     |
| 34 |                           |                                                                        |     |
| 35 | <b>Methods:</b>           |                                                                        |     |
| 36 |                           |                                                                        |     |
| 37 |                           |                                                                        |     |
| 38 | <b>Assignment of</b>      |                                                                        |     |
| 39 |                           |                                                                        |     |
| 40 | <b>interventions (for</b> |                                                                        |     |
| 41 |                           |                                                                        |     |
| 42 | <b>controlled trials)</b> |                                                                        |     |
| 43 |                           |                                                                        |     |
| 44 |                           |                                                                        |     |
| 45 | Allocation:               | <a href="#">#16a</a> Method of generating the allocation sequence (eg, | 9   |
| 46 |                           | computer-generated random numbers), and list of                        |     |
| 47 | sequence                  | any factors for stratification. To reduce                              |     |
| 48 |                           | predictability of a random sequence, details of any                    |     |
| 49 | generation                | planned restriction (eg, blocking) should be                           |     |
| 50 |                           | provided in a separate document that is                                |     |
| 51 |                           |                                                                        |     |
| 52 |                           |                                                                        |     |
| 53 |                           |                                                                        |     |
| 54 |                           |                                                                        |     |
| 55 |                           |                                                                        |     |
| 56 |                           |                                                                        |     |
| 57 |                           |                                                                        |     |
| 58 |                           |                                                                        |     |
| 59 |                           |                                                                        |     |
| 60 |                           |                                                                        |     |

|    |                        |                      |                                                        |       |
|----|------------------------|----------------------|--------------------------------------------------------|-------|
| 1  |                        |                      | unavailable to those who enrol participants or         |       |
| 2  |                        |                      |                                                        |       |
| 3  |                        |                      | assign interventions                                   |       |
| 4  |                        |                      |                                                        |       |
| 5  |                        |                      |                                                        |       |
| 6  | Allocation             | <a href="#">#16b</a> | Mechanism of implementing the allocation               | 9     |
| 7  |                        |                      |                                                        |       |
| 8  | concealment            |                      | sequence (eg, central telephone; sequentially          |       |
| 9  |                        |                      |                                                        |       |
| 10 | mechanism              |                      | numbered, opaque, sealed envelopes), describing        |       |
| 11 |                        |                      |                                                        |       |
| 12 |                        |                      | any steps to conceal the sequence until                |       |
| 13 |                        |                      |                                                        |       |
| 14 |                        |                      |                                                        |       |
| 15 |                        |                      | interventions are assigned                             |       |
| 16 |                        |                      |                                                        |       |
| 17 |                        |                      |                                                        |       |
| 18 | Allocation:            | <a href="#">#16c</a> | Who will generate the allocation sequence, who         | 9     |
| 19 |                        |                      |                                                        |       |
| 20 | implementation         |                      | will enrol participants, and who will assign           |       |
| 21 |                        |                      |                                                        |       |
| 22 |                        |                      | participants to interventions                          |       |
| 23 |                        |                      |                                                        |       |
| 24 |                        |                      |                                                        |       |
| 25 |                        |                      |                                                        |       |
| 26 | Blinding (masking)     | <a href="#">#17a</a> | Who will be blinded after assignment to                | 9     |
| 27 |                        |                      |                                                        |       |
| 28 |                        |                      | interventions (eg, trial participants, care providers, |       |
| 29 |                        |                      |                                                        |       |
| 30 |                        |                      | outcome assessors, data analysts), and how             |       |
| 31 |                        |                      |                                                        |       |
| 32 |                        |                      |                                                        |       |
| 33 | Blinding (masking):    | <a href="#">#17b</a> | If blinded, circumstances under which unblinding is    | N/A   |
| 34 |                        |                      |                                                        |       |
| 35 | emergency              |                      | permissible, and procedure for revealing a             |       |
| 36 |                        |                      |                                                        |       |
| 37 | unblinding             |                      | participant's allocated intervention during the trial  |       |
| 38 |                        |                      |                                                        |       |
| 39 |                        |                      |                                                        |       |
| 40 |                        |                      |                                                        |       |
| 41 | <b>Methods: Data</b>   |                      |                                                        |       |
| 42 |                        |                      |                                                        |       |
| 43 | <b>collection,</b>     |                      |                                                        |       |
| 44 |                        |                      |                                                        |       |
| 45 | <b>management, and</b> |                      |                                                        |       |
| 46 |                        |                      |                                                        |       |
| 47 | <b>analysis</b>        |                      |                                                        |       |
| 48 |                        |                      |                                                        |       |
| 49 |                        |                      |                                                        |       |
| 50 |                        |                      |                                                        |       |
| 51 | Data collection plan   | <a href="#">#18a</a> | Plans for assessment and collection of outcome,        | 11-12 |
| 52 |                        |                      |                                                        |       |
| 53 |                        |                      | baseline, and other trial data, including any related  |       |
| 54 |                        |                      |                                                        |       |
| 55 |                        |                      | processes to promote data quality (eg, duplicate       |       |
| 56 |                        |                      |                                                        |       |
| 57 |                        |                      | measurements, training of assessors) and a             |       |
| 58 |                        |                      |                                                        |       |
| 59 |                        |                      |                                                        |       |
| 60 |                        |                      |                                                        |       |

description of study instruments (eg, questionnaires, laboratory tests) along with their reliability and validity, if known. Reference to where data collection forms can be found, if not in the protocol

|    |                        |                      |                                                        |
|----|------------------------|----------------------|--------------------------------------------------------|
| 1  |                        |                      |                                                        |
| 2  |                        |                      |                                                        |
| 3  |                        |                      |                                                        |
| 4  |                        |                      |                                                        |
| 5  |                        |                      |                                                        |
| 6  |                        |                      |                                                        |
| 7  |                        |                      |                                                        |
| 8  |                        |                      |                                                        |
| 9  |                        |                      |                                                        |
| 10 |                        |                      |                                                        |
| 11 |                        |                      |                                                        |
| 12 |                        |                      |                                                        |
| 13 | Data collection plan:  | <a href="#">#18b</a> | Plans to promote participant retention and             |
| 14 |                        |                      |                                                        |
| 15 | retention              |                      | complete follow-up, including list of any outcome      |
| 16 |                        |                      | data to be collected for participants who              |
| 17 |                        |                      | discontinue or deviate from intervention protocols     |
| 18 |                        |                      |                                                        |
| 19 |                        |                      |                                                        |
| 20 |                        |                      |                                                        |
| 21 |                        |                      |                                                        |
| 22 | Data management        | <a href="#">#19</a>  | Plans for data entry, coding, security, and storage,   |
| 23 |                        |                      |                                                        |
| 24 |                        |                      | including any related processes to promote data        |
| 25 |                        |                      | quality (eg, double data entry; range checks for       |
| 26 |                        |                      | data values). Reference to where details of data       |
| 27 |                        |                      | management procedures can be found, if not in the      |
| 28 |                        |                      | protocol                                               |
| 29 |                        |                      |                                                        |
| 30 |                        |                      |                                                        |
| 31 |                        |                      |                                                        |
| 32 |                        |                      |                                                        |
| 33 |                        |                      |                                                        |
| 34 |                        |                      |                                                        |
| 35 |                        |                      |                                                        |
| 36 |                        |                      |                                                        |
| 37 | Statistics: outcomes   | <a href="#">#20a</a> | Statistical methods for analysing primary and          |
| 38 |                        |                      |                                                        |
| 39 |                        |                      | secondary outcomes. Reference to where other           |
| 40 |                        |                      | details of the statistical analysis plan can be found, |
| 41 |                        |                      | if not in the protocol                                 |
| 42 |                        |                      |                                                        |
| 43 |                        |                      |                                                        |
| 44 |                        |                      |                                                        |
| 45 |                        |                      |                                                        |
| 46 |                        |                      |                                                        |
| 47 | Statistics: additional | <a href="#">#20b</a> | Methods for any additional analyses (eg, subgroup      |
| 48 | analyses               |                      | and adjusted analyses)                                 |
| 49 |                        |                      |                                                        |
| 50 |                        |                      |                                                        |
| 51 |                        |                      |                                                        |
| 52 | Statistics: analysis   | <a href="#">#20c</a> | Definition of analysis population relating to protocol |
| 53 |                        |                      |                                                        |
| 54 | population and         |                      | non-adherence (eg, as randomised analysis), and        |
| 55 |                        |                      |                                                        |
| 56 | missing data           |                      |                                                        |
| 57 |                        |                      |                                                        |
| 58 |                        |                      |                                                        |
| 59 |                        |                      |                                                        |
| 60 |                        |                      |                                                        |

any statistical methods to handle missing data (eg,  
multiple imputation)

## Methods: Monitoring

|                                      |                      |                                                                                                                                                                                                                                                                                                                                                         |     |
|--------------------------------------|----------------------|---------------------------------------------------------------------------------------------------------------------------------------------------------------------------------------------------------------------------------------------------------------------------------------------------------------------------------------------------------|-----|
| Data monitoring:<br>formal committee | <a href="#">#21a</a> | Composition of data monitoring committee (DMC);<br>summary of its role and reporting structure;<br>statement of whether it is independent from the<br>sponsor and competing interests; and reference to<br>where further details about its charter can be<br>found, if not in the protocol. Alternatively, an<br>explanation of why a DMC is not needed | 6   |
| Data monitoring:<br>interim analysis | <a href="#">#21b</a> | Description of any interim analyses and stopping<br>guidelines, including who will have access to these<br>interim results and make the final decision to<br>terminate the trial                                                                                                                                                                        | 6   |
| Harms                                | <a href="#">#22</a>  | Plans for collecting, assessing, reporting, and<br>managing solicited and spontaneously reported<br>adverse events and other unintended effects of<br>trial interventions or trial conduct                                                                                                                                                              | 12  |
| Auditing                             | <a href="#">#23</a>  | Frequency and procedures for auditing trial<br>conduct, if any, and whether the process will be<br>independent from investigators and the sponsor                                                                                                                                                                                                       | N/A |

## Ethics and dissemination

|    |                    |                      |                                                        |            |
|----|--------------------|----------------------|--------------------------------------------------------|------------|
| 1  | Research ethics    | <a href="#">#24</a>  | Plans for seeking research ethics committee /          | <b>16</b>  |
| 2  |                    |                      |                                                        |            |
| 3  | approval           |                      | institutional review board (REC / IRB) approval        |            |
| 4  |                    |                      |                                                        |            |
| 5  |                    |                      |                                                        |            |
| 6  | Protocol           | <a href="#">#25</a>  | Plans for communicating important protocol             | <b>N/A</b> |
| 7  |                    |                      |                                                        |            |
| 8  | amendments         |                      | modifications (eg, changes to eligibility criteria,    |            |
| 9  |                    |                      | outcomes, analyses) to relevant parties (eg,           |            |
| 10 |                    |                      | investigators, REC / IRBs, trial participants, trial   |            |
| 11 |                    |                      | registries, journals, regulators)                      |            |
| 12 |                    |                      |                                                        |            |
| 13 |                    |                      |                                                        |            |
| 14 |                    |                      |                                                        |            |
| 15 |                    |                      |                                                        |            |
| 16 |                    |                      |                                                        |            |
| 17 |                    |                      |                                                        |            |
| 18 | Consent or assent  | <a href="#">#26a</a> | Who will obtain informed consent or assent from        | <b>14</b>  |
| 19 |                    |                      |                                                        |            |
| 20 |                    |                      | potential trial participants or authorised surrogates, |            |
| 21 |                    |                      | and how (see Item 32)                                  |            |
| 22 |                    |                      |                                                        |            |
| 23 |                    |                      |                                                        |            |
| 24 |                    |                      |                                                        |            |
| 25 |                    |                      |                                                        |            |
| 26 | Consent or assent: | <a href="#">#26b</a> | Additional consent provisions for collection and use   | <b>N/A</b> |
| 27 |                    |                      |                                                        |            |
| 28 | ancillary studies  |                      | of participant data and biological specimens in        |            |
| 29 |                    |                      | ancillary studies, if applicable                       |            |
| 30 |                    |                      |                                                        |            |
| 31 |                    |                      |                                                        |            |
| 32 |                    |                      |                                                        |            |
| 33 |                    |                      |                                                        |            |
| 34 | Confidentiality    | <a href="#">#27</a>  | How personal information about potential and           | <b>14</b>  |
| 35 |                    |                      |                                                        |            |
| 36 |                    |                      | enrolled participants will be collected, shared, and   |            |
| 37 |                    |                      |                                                        |            |
| 38 |                    |                      | maintained in order to protect confidentiality         |            |
| 39 |                    |                      | before, during, and after the trial                    |            |
| 40 |                    |                      |                                                        |            |
| 41 |                    |                      |                                                        |            |
| 42 |                    |                      |                                                        |            |
| 43 |                    |                      |                                                        |            |
| 44 | Declaration of     | <a href="#">#28</a>  | Financial and other competing interests for            | <b>16</b>  |
| 45 |                    |                      |                                                        |            |
| 46 | interests          |                      | principal investigators for the overall trial and each |            |
| 47 |                    |                      | study site                                             |            |
| 48 |                    |                      |                                                        |            |
| 49 |                    |                      |                                                        |            |
| 50 |                    |                      |                                                        |            |
| 51 | Data access        | <a href="#">#29</a>  | Statement of who will have access to the final trial   | <b>16</b>  |
| 52 |                    |                      |                                                        |            |
| 53 |                    |                      | dataset, and disclosure of contractual agreements      |            |
| 54 |                    |                      | that limit such access for investigators               |            |
| 55 |                    |                      |                                                        |            |
| 56 |                    |                      |                                                        |            |
| 57 |                    |                      |                                                        |            |
| 58 |                    |                      |                                                        |            |
| 59 |                    |                      |                                                        |            |
| 60 |                    |                      |                                                        |            |

|    |                       |                      |                                                        |               |
|----|-----------------------|----------------------|--------------------------------------------------------|---------------|
| 1  | Ancillary and post    | <a href="#">#30</a>  | Provisions, if any, for ancillary and post-trial care, | N/A           |
| 2  |                       |                      |                                                        |               |
| 3  | trial care            |                      | and for compensation to those who suffer harm          |               |
| 4  |                       |                      |                                                        |               |
| 5  |                       |                      | from trial participation                               |               |
| 6  |                       |                      |                                                        |               |
| 7  |                       |                      |                                                        |               |
| 8  |                       |                      |                                                        |               |
| 9  | Dissemination         | <a href="#">#31a</a> | Plans for investigators and sponsor to                 | 14            |
| 10 |                       |                      |                                                        |               |
| 11 | policy: trial results |                      | communicate trial results to participants,             |               |
| 12 |                       |                      |                                                        |               |
| 13 |                       |                      | healthcare professionals, the public, and other        |               |
| 14 |                       |                      |                                                        |               |
| 15 |                       |                      | relevant groups (eg, via publication, reporting in     |               |
| 16 |                       |                      | results databases, or other data sharing               |               |
| 17 |                       |                      | arrangements), including any publication               |               |
| 18 |                       |                      | restrictions                                           |               |
| 19 |                       |                      |                                                        |               |
| 20 |                       |                      |                                                        |               |
| 21 |                       |                      |                                                        |               |
| 22 |                       |                      |                                                        |               |
| 23 |                       |                      |                                                        |               |
| 24 |                       |                      |                                                        |               |
| 25 | Dissemination         | <a href="#">#31b</a> | Authorship eligibility guidelines and any intended     | N/A           |
| 26 |                       |                      |                                                        |               |
| 27 | policy: authorship    |                      | use of professional writers                            |               |
| 28 |                       |                      |                                                        |               |
| 29 |                       |                      |                                                        |               |
| 30 |                       |                      |                                                        |               |
| 31 | Dissemination         | <a href="#">#31c</a> | Plans, if any, for granting public access to the full  | N/A           |
| 32 |                       |                      |                                                        |               |
| 33 | policy: reproducible  |                      | protocol, participant-level dataset, and statistical   |               |
| 34 |                       |                      |                                                        |               |
| 35 | research              |                      | code                                                   |               |
| 36 |                       |                      |                                                        |               |
| 37 |                       |                      |                                                        |               |
| 38 | <b>Appendices</b>     |                      |                                                        |               |
| 39 |                       |                      |                                                        |               |
| 40 |                       |                      |                                                        |               |
| 41 |                       |                      |                                                        |               |
| 42 | Informed consent      | <a href="#">#32</a>  | Model consent form and other related                   | See           |
| 43 |                       |                      |                                                        |               |
| 44 | materials             |                      | documentation given to participants and authorised     | Supplementary |
| 45 |                       |                      |                                                        |               |
| 46 |                       |                      | surrogates                                             | file          |
| 47 |                       |                      |                                                        |               |
| 48 |                       |                      |                                                        |               |
| 49 | Biological            | <a href="#">#33</a>  | Plans for collection, laboratory evaluation, and       | N/A           |
| 50 |                       |                      |                                                        |               |
| 51 | specimens             |                      | storage of biological specimens for genetic or         |               |
| 52 |                       |                      |                                                        |               |
| 53 |                       |                      | molecular analysis in the current trial and for future |               |
| 54 |                       |                      |                                                        |               |
| 55 |                       |                      | use in ancillary studies, if applicable                |               |
| 56 |                       |                      |                                                        |               |
| 57 |                       |                      |                                                        |               |
| 58 |                       |                      |                                                        |               |
| 59 |                       |                      |                                                        |               |
| 60 |                       |                      |                                                        |               |

1 None The SPIRIT checklist is distributed under the terms of the Creative Commons Attribution  
2  
3 License CC-BY-ND 3.0. This checklist can be completed online using <https://www.goodreports.org/>, a  
4  
5 tool made by the [EQUATOR Network](#) in collaboration with [Penelope.ai](#)  
6  
7  
8  
9  
10  
11  
12  
13  
14  
15  
16  
17  
18  
19  
20  
21  
22  
23  
24  
25  
26  
27  
28  
29  
30  
31  
32  
33  
34  
35  
36  
37  
38  
39  
40  
41  
42  
43  
44  
45  
46  
47  
48  
49  
50  
51  
52  
53  
54  
55  
56  
57  
58  
59  
60

For peer review only



# BMJ Open

## A cluster randomised controlled trial to determine the effect of peer delivery HIV Self-Testing to support linkage to HIV prevention among young women in rural KwaZulu-Natal, South Africa: study protocol

|                                 |                                                                                                                                                                                                                                                                                                                                                                                                                                                                                                                                                                                                                                                                                                                                                                                                                                                                                                                                                                                                                                                                                                                                                                            |
|---------------------------------|----------------------------------------------------------------------------------------------------------------------------------------------------------------------------------------------------------------------------------------------------------------------------------------------------------------------------------------------------------------------------------------------------------------------------------------------------------------------------------------------------------------------------------------------------------------------------------------------------------------------------------------------------------------------------------------------------------------------------------------------------------------------------------------------------------------------------------------------------------------------------------------------------------------------------------------------------------------------------------------------------------------------------------------------------------------------------------------------------------------------------------------------------------------------------|
| Journal:                        | <i>BMJ Open</i>                                                                                                                                                                                                                                                                                                                                                                                                                                                                                                                                                                                                                                                                                                                                                                                                                                                                                                                                                                                                                                                                                                                                                            |
| Manuscript ID                   | bmjopen-2019-033435.R1                                                                                                                                                                                                                                                                                                                                                                                                                                                                                                                                                                                                                                                                                                                                                                                                                                                                                                                                                                                                                                                                                                                                                     |
| Article Type:                   | Protocol                                                                                                                                                                                                                                                                                                                                                                                                                                                                                                                                                                                                                                                                                                                                                                                                                                                                                                                                                                                                                                                                                                                                                                   |
| Date Submitted by the Author:   | 06-Nov-2019                                                                                                                                                                                                                                                                                                                                                                                                                                                                                                                                                                                                                                                                                                                                                                                                                                                                                                                                                                                                                                                                                                                                                                |
| Complete List of Authors:       | Adeagbo, Oluwafemi; Africa Centre for Health and Population Studies; University of Johannesburg, Sociology<br>Mthiyane, Nondumiso; Africa Centre for Health and Population Studies<br>Herbst, Carina; Africa Centre for Health and Population Studies<br>Mee, Paul; London School of Hygiene and Tropical Medicine,<br>Neuman, Melissa; London School of Hygiene and Tropical Medicine,<br>Dreyer, Jaco; Africa Centre for Health and Population Studies<br>Chimbindi, Natsayi; Africa Centre for Health and Population Studies<br>Smit, Theresa; Africa Centre for Health and Population Studies<br>Okesola, Nonhlanhla; Africa Centre for Health and Population Studies<br>Johnson, Cheryl; World Health Organization, Department of HIV/AIDS<br>Hatzold, Karin; Population Services International<br>Seeley, Janet; Africa Centre for Health and Population Studies; London<br>School of Hygiene and Tropical Medicine,<br>Cowan, F; Liverpool School of Tropical Medicine, International Public<br>Health; CeSHHAR Zimbabwe,<br>Corbett, Liz; LSHTM, Infectious and Tropical Diseases<br>Shahmanesh, Maryam; University College London, Institute for Global<br>Health |
| <b>Primary Subject Heading</b>: | HIV/AIDS                                                                                                                                                                                                                                                                                                                                                                                                                                                                                                                                                                                                                                                                                                                                                                                                                                                                                                                                                                                                                                                                                                                                                                   |
| Secondary Subject Heading:      | Health services research, HIV/AIDS, Global health, Evidence based practice, Health policy                                                                                                                                                                                                                                                                                                                                                                                                                                                                                                                                                                                                                                                                                                                                                                                                                                                                                                                                                                                                                                                                                  |
| Keywords:                       | HIV/AIDS, Peer delivery model, South Africa, PrEP, ART, HIV Self-testing                                                                                                                                                                                                                                                                                                                                                                                                                                                                                                                                                                                                                                                                                                                                                                                                                                                                                                                                                                                                                                                                                                   |
|                                 |                                                                                                                                                                                                                                                                                                                                                                                                                                                                                                                                                                                                                                                                                                                                                                                                                                                                                                                                                                                                                                                                                                                                                                            |

SCHOLARONE™  
Manuscripts

1  
2  
3  
4 **A cluster randomised controlled trial to determine the effect of peer delivery HIV Self-Testing**  
5 **to support linkage to HIV prevention among young women in rural KwaZulu-Natal, South**  
6 **Africa: study protocol**  
7

8  
9  
10 *Adeagbo OA<sup>1,2,4</sup>, Mthiyane TN<sup>1</sup>, Herbst C<sup>1</sup>, Mee P<sup>3</sup>, Neuman M<sup>3</sup>, Dreyer J<sup>1</sup>, Chimbindi N<sup>1,2</sup>, Smit T<sup>1</sup>;*  
11 *Okesola N<sup>1</sup>, Johnson C<sup>7</sup>, HatZold K<sup>8</sup>, Seeley J<sup>1,3</sup>, Cowan F<sup>5,6</sup>, Corbett L<sup>3</sup>, Shahmanesh M<sup>1,2</sup>*  
12

13 <sup>1</sup>Africa Health Research Institute, South Africa (formerly known as Africa Centre for Health & Population  
14 Studies)  
15

16 <sup>2</sup>University College London, UK  
17

18 <sup>3</sup>London School of Hygiene & Tropical Medicine, UK  
19

20 <sup>4</sup>University of Johannesburg, South Africa  
21

22 <sup>5</sup>The Centre for Sexual Health and HIV/AIDS Research, Zimbabwe  
23

24 <sup>6</sup>Liverpool School of Tropical Medicine  
25

26 <sup>7</sup>World Health Organisation, Switzerland  
27

28 <sup>8</sup>Population Services International  
29

30 **Corresponding Author:** Maryam Shahmanesh, Institute of Global Health, University College London,  
31 W61E JB, United Kingdom [m.shahmanesh@ucl.ac.uk](mailto:m.shahmanesh@ucl.ac.uk)  
32  
33

34 **ABSTRACT**  
35  
36  
37

38 **Introduction:**  
39

40 A cluster randomised controlled trial (cRCT) to determine whether HIV self-testing (HIVST) delivered by  
41 peers either directly or through incentivised peer-networks, could increase the uptake of antiretroviral  
42 therapy and Pre-Exposure Prophylaxis amongst young women (18-24 years) is being undertaken in an HIV  
43 hyperendemic area in KwaZulu-Natal, South Africa.  
44

45 **Methods and analysis:**  
46

47 A 3-arm cRCT started mid-March 2019, in 24 areas in rural KwaZulu-Natal. Twenty-four pairs of peer  
48 navigators working with ~12000 young people aged 18-30 years over a period of 6 months were  
49 randomised to: (1) *incentivised-peer-networks (IPN)*: peer-navigators recruited participants “seeds” to  
50 distribute up to 5 HIVST packs and HIV prevention information to peers within their social networks. Seeds  
51 receive an incentive (20 Rand = \$1.5) for each respondent who contacts a peer-navigator for additional  
52 HIVST packs to distribute; (2) *peer-navigator-distribution (PND)*: peer-navigators distribute HIVST packs  
53 and information directly to young people; (3) *standard of care (SOC)*: peer-navigators distribute referral  
54 slips and information. All arms promote sexual health information and provide barcoded clinic referral  
55  
56  
57



1  
2  
3 incidence persists despite an increasing range of effective HIV prevention and treatment interventions,  
4 including condoms, antiretroviral (ART) based prevention e.g. pre-exposure prophylaxis (PrEP), universal  
5 test and treat (UTT) <sup>4,5</sup> and voluntary medical male circumcision (VMMC).

7  
8 Evidence from South Africa and other countries in sub-Saharan Africa shows that this is partly due to the  
9 fact that many young people living with HIV are undiagnosed and therefore not linked to care <sup>6,7</sup>. Similarly,  
10 a recent treatment-as-prevention (TasP) trial conducted in this area failed to show an impact on incidence  
11 in part due to the challenge of testing and linking young women <sup>8</sup>. Patient level fears (e.g. stigma, labelling  
12 and discrimination) and facility level barriers (e.g. distance, waiting times and provider attitudes) continue  
13 to be barriers to young people not seeking HIV care services (HIV testing and uptake and adherence to  
14 antiretroviral therapy for treatment) in health facilities <sup>9-11</sup>. There is an urgent need to increase the  
15 proportion of those (particularly AGYW) who know their HIV status and take up effective HIV treatment  
16 as well as prevention – including ART based care and prevention.

19  
20 To increase global testing rates and early access to treatment or PrEP, HIV self-testing (HIVST) – a simple  
21 saliva or blood-based self-test similar to a pregnancy test - has been identified as a potential method given  
22 its privacy and convenience <sup>12-16</sup>. Studies from different countries including South Africa have shown high  
23 acceptability and uptake of HIVST particularly amongst first time testers and young people <sup>13,14,16-19</sup>. Also,  
24 a growing number of studies have shown that rapid oral fluid testing was preferred to blood-based testing  
25 <sup>20-22</sup>. The OraQuick® In-home HIV test (OraSure Technologies, Inc., Bethlehem, PA, manufactured in  
26 Thailand) was recently pre-qualified by the World Health Organization for international procurement<sup>23</sup>.  
27 Field based use confirmed the high accuracy of HIVST, albeit with some variability across different  
28 educational levels<sup>14,18,24</sup>. HIVST (OraQuick) product is currently available in South Africa and has been  
29 endorsed by the National Department of Health (NDoH) in those aged 18 and above, with  
30 recommendations emphasizing the need for health care worker supported testing in those aged 18 and  
31 under.

34  
35 Effective biomedical innovations such as PrEP have the potential to be gamechangers in the HIV epidemic  
36 in South Africa as part of the combination HIV prevention strategy and have thus been recommended for  
37 key populations such as sex workers, men who have sex with men and adolescent girls and young women  
38 aged 15-24 by the NDoH in South Africa<sup>25</sup>. However, their effectiveness will depend on HIV testing uptake  
39 and subsequent linkage to care and prevention <sup>26-28</sup>. The key findings from systematic reviews of the HIV  
40 treatment cascade suggest that: (1) community-based delivery models, including adherence clubs,  
41 community health workers delivering de-centralised care, and task-shifting to lay caregivers providing  
42 support across conditions, improve both ART uptake and sustained retention in low and middle-income  
43 settings <sup>29-31</sup>; (2) peer support is effective to deliver health intervention particularly to hard-to-reach  
44 groups <sup>32,33</sup>. Moreover, there is some evidence to suggest that HIVST can improve linkage to treatment  
45 when coupled with community based support <sup>19,34</sup>. However, there is limited evidence of the effectiveness  
46 of HIVST to link people who are negative to prevention, and in particular PrEP, with or without community-  
47 based support.

51  
52 Here, we describe a cluster randomised controlled trial to address this critical gap in HIVST evidence and  
53 linkage for young women aged 18-24 years. Although all young people aged 18-30 years are included in  
54 the peer-led community based promotion of HIV testing and linkage to HIV prevention and care, the aim  
55 of this trial is to determine whether HIVST delivered by peers either directly or through incentivised peer-  
56

1  
2  
3 networks, can increase the uptake of antiretroviral therapy (ART) and Pre-Exposure Prophylaxis (PrEP)  
4 amongst adolescent girls and young women (18-24 years) in a high HIV transmission setting in KwaZulu-  
5 Natal (KZN), South Africa. To the best of our knowledge, this is one of the first trials to test the  
6 effectiveness of oral-based HIVST to improve uptake of prevention in South Africa.  
7

## 8 9 **STUDY AIMS AND OBJECTIVES**

10 The specific aims of this trial are to: (1) increase the knowledge of HIV status among young women aged  
11 18-24 years old and their young male partners through the distribution of HIVST through incentivised peer  
12 networks or direct distribution by peer navigators compared to peer navigators referring them into HIV  
13 testing services; (2) determine an increase in the rate of linkage among young women aged 18-24 years  
14 to HIV prevention and treatment services facilitated by distribution of HIVST through incentivised peer  
15 networks or direct distribution by peer navigators compared to peer navigators referring into services; (3)  
16 determine an overall increase in young men and women aged 18-30 aware of their status and linked to  
17 HIV care and prevention; (4) conduct a process evaluation of the acceptability, feasibility, and reach (out  
18 of school, recently migrant and living in remote areas) in linking 18-24-year-old women to HIV prevention  
19 and treatment services of HIVST distribution through incentivised peer networks, or direct distribution  
20 by peer navigators or peer navigators referring into services and (5) measure the cost per 18-24-year-old  
21 woman linked to prevention and care through peer-led incentivised HIVST delivery system or direct  
22 distribution of HIVST by peer navigators, compared to peer navigator referring them to services.  
23  
24  
25  
26  
27  
28

## 29 **METHODS/DESIGN**

30  
31 This is a 3-arm cluster randomised controlled trial (two intervention arms and one control arm) launched  
32 in mid-March 2019 and currently being carried out by 24 pairs of peer navigators that have been randomly  
33 assigned to one of three arms. The following sub-headings grapple with the methods, outcomes,  
34 procedures and study design amongst others.  
35

### 36 **Study setting and population**

37  
38 This study will be conducted in Africa Health Research Institute's (AHRI) long-standing demographic  
39 surveillance area in northern KwaZulu-Natal. The study area is mostly rural, and poor compared with other  
40 parts of South Africa, with high levels of unemployment (over 85% of young adults aged 20-24 years are  
41 unemployed) and the local language is IsiZulu<sup>8</sup>. In the study area, 8 out of 100 women aged between 20  
42 and 24 years acquire HIV in one year, and 4 out of 10 women attending antenatal clinics are found to be  
43 infected with HIV. Data between 2011 and 2015 in the study area suggests that sexually active women  
44 aged 16-29 and young adult men have an HIV incidence above the threshold of eligibility for PrEP.  
45  
46  
47  
48

49 The demographic surveillance area provides over 16 years of household history, and over a million person-  
50 years of follow-up through annual individual-level surveys, which capture sexual behaviour and  
51 partnerships, reproductive histories and contraception use, access to HIV testing and care, access to HIV  
52 prevention services (including VMMC), as well as socio-demographic information. Moreover, through a  
53 Memorandum of Understanding with the Department of Health, AHRI has also embedded data collection  
54 clerks within the public health clinics to capture electronically any clinical attendance and linking it with  
55  
56  
57  
58  
59  
60

1  
2  
3 the surveillance platform on all consenting attendees. This allows us to measure linkage of individuals to  
4 HIV care and use of contraceptive services. As part of a NIH R01 we have selected, trained and employed  
5 24 pairs of peer navigators, working in 24 discrete areas (based on administrative divisions) of the  
6 demographic surveillance area (the Hlabisa district of uMkhanyakude district of northern KwaZulu-Natal  
7 (KZN), South Africa) to deliver HIV and sexual health related Health promotion to an estimated 12000  
8 youth (male and female) aged 18-30 years (~500 per each of the 24 administrative areas) and young  
9 women aged 18-24 years residing in the administrative areas (figure 1).  
10  
11  
12  
13  
14  
15

16 **Figure 1:** Map of study sites in Hlabisa sub-district in KwaZulu-Natal, South Africa  
17  
18  
19  
20  
21

## 22 **Theory of change**

23 The intervention that is being tested in this cRCT is guided by a theory of change developed through  
24 mental models and deductive development<sup>35</sup> entrenched in ecological approach<sup>36</sup>. We theorised that the  
25 distribution of HIVST kits (including linkage information and referral slips) via peer navigators or peer  
26 social networks (respondent driven sampling - RDS) would lead to improved HIV prevention cascade, HIV  
27 testing uptake and linkage to HIV treatment or prevention services such as PrEP, amongst young women  
28 aged 18-24 years by creating peer-led demand, supporting young people to explore their candidacy for  
29 HIV care and prevention in privacy, and using social networks to reach those who need it most<sup>37</sup>. Work  
30 done by our group suggested that various factors associated with 'ecological framework' such as the fear  
31 of HIV-related stigma of attending a clinic for HIV testing and discrimination from healthcare providers or  
32 community may be addressed by HIVST since individuals can test privately anywhere without fear of being  
33 seen or judged<sup>2,38</sup>. Furthermore, formative work from our group suggested that community based delivery  
34 of services through youth friendly and accessible clinics for the study participants (walk-ins and those who  
35 present the study referral slips) could provide confirmatory HIV testing, treatment, prevention,  
36 contraceptives and other health services<sup>39,40</sup>. Following this, we developed a peer-to-peer intervention to  
37 reduce the burden of HIV among young women. We used the SPIRIT reporting guidelines in this article<sup>41</sup>.  
38  
39  
40  
41  
42

## 43 **Trial design**

44 This cRCT is comparing two models of peer delivery of HIVST in the study sites through incentivised  
45 respondent driven peer networks and direct distribution by peer navigators compared to standard of care  
46 (referral to HIV testing, prevention and care services by peer navigators) in improving the uptake of HIV  
47 testing, prevention and care amongst young women (18-24 years). Eight (8) pairs of peer navigators were  
48 randomised and assigned to each study arm with the intention of reaching young women aged 18-24  
49 years with HIVST packs (including referral slips) and/or linkage information (including PrEP,  
50 contraceptives, ART etc.) during the six-month of community outreach. Peer navigators are randomised  
51 to 1 of 3 arms: 1) *incentivised-peer-networks*: peer-navigators recruited participants "seeds" to distribute  
52 up to 5 HIVST packs (including incentivised coupons) and HIV prevention information to peers within social  
53 networks. Seeds receive an incentive (20 Rand = \$1.5) for each respondent who contacts a peer-navigator  
54  
55  
56  
57  
58  
59  
60



1  
2  
3 for additional HIVST packs to distribute; (2) *peer-navigator-distribution*: peer-navigators distribute HIVST  
4 packs and information directly to young people; (3) *standard of care*: peer-navigators distribute referral  
5 slips and information. All arms promote sexual health and HIV care and prevention (including PrEP and  
6 ART) and provide barcoded clinic referral slips to facilitate linkage to HIV testing, prevention and care  
7 services (figure 2).  
8  
9

10 The unit of randomisation is the pair of peer navigators working in each of the 24 areas included in the  
11 study. The areas are not adjoining, and each is bordered by a natural boundary (e.g. roads or streams) or  
12 by a sizeable distance. Although contamination is inevitable in this type of cRCT, the spillover effects are  
13 contained by measuring the outcome by exposure to the peer-navigator cluster in multiple ways, including  
14 barcoded and colour coded referral slips as well as peer-navigator and ward names that determine  
15 participant exposure to specific intervention components. Coupled with this, we are conducting a mixed  
16 method process evaluation that provides context and add nuance to our understanding of any  
17 contamination.  
18  
19  
20

### 21 **Outcomes**

22 The long-term goal of the intervention is to increase knowledge of HIV status and improve linkage to HIV  
23 care or prevention services such as PrEP amongst young women aged 18-24 years. A number of primary  
24 and secondary measures have been defined a priori. An interim analysis of the primary outcome will be  
25 conducted at 3 months.  
26

27 Primary outcome:

28  
29 The primary outcome compares the difference in linkage rate between arms, defined as the number of  
30 women (18-24 years) per peer-navigator month of outreach work (/pnm) who linked to clinic-based PrEP  
31 eligibility screening or started ART, based on HIV-status, within 90 days of referral.  
32  
33

34 Secondary outcomes:

35  
36 The following calculations are planned for the secondary outcomes:

- 37  
38  
39  
40  
41  
42  
43  
44  
45  
46  
47  
48  
49  
50  
51
- Comparison of the difference per study arm of the total number of linkages (AGYW aged 18-24) per 100 clinic referral slips distributed.
  - Comparison of the difference per study arm of the total number of linkages in men and women aged 18-30 per peer navigator outreach month.
  - The change in proportion of young people aged 18-24 years who are aware of HIVST and who have used HIVST over time.
  - Comparison of the difference per study area in the proportion of 18-24-year olds who report knowledge of HIV status and uptake of ART, PrEP and voluntary medical male circumcision (VMMC) in the surveillance area.
  - The proportion of hard-to-reach adolescent girls and young women (aged 18-24 years) linked to care in the three study arms.

### 52 **Description of study arms**

53  
54 Intervention arm 1 – incentivised network distribution of HIVST: n=8 pairs of peer navigators are using  
55 RDS approach to distribute HIVST with health promotion and linkage information (e.g. clinic referral slips  
56  
57  
58  
59  
60



1  
2  
3 and information about HIV and PrEP). Each pair of peer navigator recruits n=10, 18-24 years old female  
4 seeds from the participating communities. Each seed fills a brief *service recipient questionnaire* – self-filled  
5 on a tablet. Following which they receive verbal health promotion from the peer-navigator on the HIV  
6 prevention services available, the importance of sexual health, the benefits of HIV testing PrEP and ART,  
7 and a demonstration of HIVST. Seeds are asked to recruit AGYW aged 18-24 years preferentially but not  
8 exclusively and to avoid distribution of HIVST to those under the age of 18 or over the age of 30. All seeds  
9 are asked to complete a brief check of their understanding of the information provided to them,  
10 particularly information about not using HIVST if someone is on ART, the window period, the  
11 recommended support to those under 18 using HIVST, and the need for confirmatory testing.  
12  
13  
14  
15

16 As shown in fig. 3, individuals who return with one of the coupons to a peer navigator undergo the same  
17 procedure as the seeds as described above. They are also given up to 5 uniquely numbered incentivised  
18 recruitment coupons and HIVST kits to pass on. When coupons are returned, the original individual who  
19 handed out the coupon receives a sum of R20 (\$1.5) in airtime per friend or peer who returns the coupon.  
20 This sum is a reimbursement for the time that they have spent in explaining and demonstrating the use  
21 of an HIVST and is not seen to be an undue incentive to coerce members of their social network to  
22 participate. There is no gender restriction of those recruited through the networks, however the primary  
23 outcome will be measured in young women aged 18-24 years only.  
24  
25  
26

27 Intervention arm 2: peer navigator direct distribution of HIVST: n=8 pairs of peer navigators are  
28 distributing HIVST packs with health promotion and linkage information (e.g. clinic referral slips and  
29 information about HIV and PrEP) directly to young people aged 18-30 years over a period of six months.  
30 Each person contacted fills a brief *service recipient questionnaire* – self-filled on a tablet. Following which  
31 they receive verbal health promotion from the peer-navigator on the HIV prevention services available,  
32 the importance of sexual health, the benefits of HIV testing, PrEP and ART, and a demonstration of HIV  
33 self-screening. All participants are asked to complete a brief check of their understanding of the  
34 information provided to them, particularly information about the unreliability of HIVST if someone is on  
35 ART, the window period, the recommended support to those under 18 using HIVST, and the need for  
36 confirmatory testing..  
37  
38  
39  
40

41 Control - arm 3: n=8 pairs of peer navigators are currently distributing packs with health promotion and  
42 linkage information (e.g. clinic referral slips and information about HIV and PrEP) to encourage young  
43 people aged 18-30 years to test for HIV at clinics, and link to services/care. Each female aged 18-30  
44 approached fills a brief *service recipient questionnaire* – self-filled on a tablet. Following which they  
45 receive verbal health promotion from the peer-navigator on the HIV prevention services available, the  
46 importance of sexual health, the benefits of HIV testing PrEP and ART.  
47  
48  
49  
50  
51  
52  
53

54 **Figure 2:** Flow diagram of trial enrolment, randomisation and intervention arms  
55  
56  
57  
58  
59  
60

## Study oversight

An independent scientific Technical Advisory Group (TAG) was formed by the Unitaid-funded HIV Self-Testing Africa initiative (STAR – a consortium of scientists conducting HIV self-testing related research in different countries) to monitor and supervise the progress of data collection, provide independent review of data collected during all cRCTs conducted under the STAR initiative, and assist investigators in disseminating results. TAG comprises members with expertise in HIV epidemiology, statistics, health economics, social science and AGYW. TAG will convene periodic meetings to review data and discuss any issues emanating from this trial.

## Study inclusion and exclusion criteria

Complete inclusion and exclusion criteria are summarised in tables 1 to 3. There are criteria for different recruitment stages in the trial. Above all, participants must not be less than 18 and not more than 30 years old. They must provide informed consent, not currently on ART and must be living in the study sites.

Table 1: Inclusion and exclusion criteria for receiving the intervention, i.e. the recruitment by Peer Navigators and/or Seeds to receive HIVST packs or clinical referral slips

| Inclusion criteria                                                    | Exclusion criteria                                 |
|-----------------------------------------------------------------------|----------------------------------------------------|
| Participant must not be older than 30 years and younger than 18 years | Participants under 18 years or older than 30 years |
| Participant must agree to participate                                 | Participant unwilling to participate               |
| Both males and females can be included                                | None                                               |
| Must not be known to be on ART – based on self-report                 | If on ART                                          |

Table 2: Inclusion and exclusion criteria for ascertaining the primary outcome

| Inclusion criteria                                                    | Exclusion criteria                                                        |
|-----------------------------------------------------------------------|---------------------------------------------------------------------------|
| Participant must not be older than 24 years and younger than 18 years | Participants under 18 years or older than 24 years                        |
| Provide written informed consent                                      | Participants not willing to consent or unable to provide informed consent |
| Females                                                               | Males                                                                     |
| Must not be known to be currently on ART                              | Currently on ART                                                          |

Table 3: Inclusion and exclusion criteria for ascertaining the secondary outcome

| Inclusion criteria                                                    | Exclusion criteria                                                        |
|-----------------------------------------------------------------------|---------------------------------------------------------------------------|
| Participant must not be older than 30 years and younger than 18 years | Participants under 18 years or older than 30 years                        |
| Provide written informed consent                                      | Participants not willing to consent or unable to provide informed consent |
| Must not be known to be currently on ART                              | Currently on ART                                                          |

### Study recruitment and procedures

Study recruitment: Peer navigators are a cadre of recently matriculated youth or college graduates aged 18-30 years (male and female) recruited from the research community through the local municipal and traditional leaders. Between 6/2018-9/2018 participants underwent a 20-week training programme (3 days a week) which covered, youth development, HIV and sexual health information, HIV counselling and testing, confidentiality, ethics, and research methods, study procedures and HIVST. Progress was evaluated using written and oral assessments to select 48 peer-navigators to work in pairs and implement the intervention in their areas. The peer navigator intervention mirrors the South African cadre of community caregivers.

Before the peer navigators distribute the colour coordinated HIVST packs (each arm has its designated colour such as yellow, blue and pink) with unique identifiers in the intervention arms 1 and 2 or information packs in arm 3, the packs are being scanned and study participants are provided with information about the study and fill a brief *service recipient questionnaire* to be completed within Research Electronic Data Capture (REDCap - developed by Vanderbilt University, USA)<sup>42</sup> on a tablet (figure 3). Data collected at this point includes the date of recruitment, and the ID of peer navigator who recruited them, their age and area of residence. Participant's name, ID (e.g. SA national number), and telephone or WhatsApp contact are optional. Those who are recruited through RDS will also be asked to provide data on their network size, barcode of the RDS coupons and the additional HIVST kits are scanned for further distribution.

Peer navigators spend ~ 30 minutes with each willing participant to explain the benefits of linking to care and prevention. Those explaining HIVST need 15-20 minutes extra and some young people require more time or more visits. This data is captured in REDCap for the purpose of process evaluation and costing. This data will be used in an aggregate way to understand the process and cost of the service delivery. Individualised data from the survey will only be used in those participants that consent to their clinical data being linked and used for research purposes. If a participant withdraws their consent at any time, their data will be deleted from the research data set.

Study enrolment: Both walk-ins and study participants aged 18-30 years are eligible for receiving services from the designated study clinics. However, only those who have been referred through one of the three arms are eligible for study enrollment. This is being conducted by trained clinical research assistants in the designated study mobile and fixed clinics (figure 4). Also, all young women aged 18-24 years coming to one of the 11 primary health care clinics (PHC) or the mobile clinics in the surveillance sites are being directed by our AHRI data collection clerks to our research nurses. In both settings, the clinical research assistants or the research nurses explain the study and screen the young person for eligibility using a brief eligibility screening questionnaire on REDCap on a tablet. This includes questions to ascertain eligibility as well as arm of the study. If available, the clinic referral slip with the barcode with the unique identifier is scanned. The brief screening questionnaire that has further simple questions to ascertain if they were referred through any of the arms, i.e. receiving any of the three colour coded packs/referral slips, or contact with a named peer navigator, or referral through peer network. Interested eligible participants then go through the process of informed consent. Participants provide written informed consent for enrollment into the study and specifically to use the information on their linkage to care as an outcome and to link their baseline questions.

1  
2  
3 Clinical procedures: Irrespective of whether they consent to the study, all eligible individuals attending  
4 clinics are offered confirmatory HIV testing, with two point of care tests and then blood sent to  
5 laboratories for ELISA testing (Genscreen™ ULTRA HIV Ag-Ab qualitative immunoassay [4<sup>th</sup> Generation]  
6 Biorad, Marnes-la-Coquette, France). Individuals who test HIV-negative receive counseling around the  
7 benefits of PrEP and HIV-positive individuals receive counselling around the benefits of immediate starting  
8 of ART. If they agree, they will undergo clinical screening for PrEP and ART. Screening includes Point of  
9 Care (POC) tests for creatinine (StatSensor-I create-test strips, Nova Biomedical UK) to assess renal  
10 function and Hepatitis B (Alere Determine™ HBsAg, Alere International Limited, Ballybrit Galway, Ireland;  
11 Architect i2000 analyzer, Abbott Diagnostics, Abbott Park, IL, USA), with vaccination offered to those who  
12 are negative, and sexual behavior questionnaire to assess eligibility.  
13  
14  
15

16 If HIV positive, ART is started by the professional nurses in any of 11 PHCs in the study sites. Patients who  
17 are eligible for PrEP are started in the three PrEP providing clinics (the mobile vans or the fixed urban  
18 adolescent and youth friendly clinic). Persons who are not eligible for PrEP receive counselling and, as  
19 indicated, a clinic referral with the screening results. A professional nurse initiates PrEP or ART usually on  
20 the same day or within two weeks of the screening visit. The professional nurse provides PrEP counselling  
21 that includes (1) *sexual health promotion*, with an emphasis on tackling the multiple health-related  
22 behaviors that will affect fertility and sexual pleasure (STIs, mental health, alcohol, diet and exercise); (2)  
23 assessment of fertility desire and contraception counselling; (3) choice of contraception and condoms; (4)  
24 HIV-negative men are also counselled around the benefits of VMMC and referred accordingly.  
25  
26  
27

28 The counsellors provide counselling on adherence and develop an individualised adherence plan with the  
29 offer of face-to-face or virtual (WhatsApp/ text based) adherence support. If the participant agrees to  
30 immediate PrEP initiation, s/he is issued with a month's supply of generic tenofovir disoproxil fumarate  
31 and emtricitabine (TDF/FTC). Baseline and follow-up bloods are taken and processed as per SA National  
32 Department of Health guidelines. The professional nurse registers the participant at the clinic (or updates  
33 the record if the participant is already registered) so that the participant's records are available should  
34 the participant seeks care there. Participants receive a phone call seven days after initiating PrEP to  
35 complete a standard symptom screen for adverse effects and be referred to clinic for care if necessary.  
36 Participants have a clinic appointment scheduled one month, after PrEP initiation, as per national  
37 guidelines; appointments for refills and monitoring will be quarterly thereafter through either the mobile  
38 clinic, or other community-based refill points. Neutral text message reminders are provided for  
39 participants who have access to private messaging and phone calls. Participants are able to reschedule  
40 their appointments by text message, WhatsApp or calling the clinical hotline. Contact information is  
41 provided for the clinics whom participants can contact at any time.  
42  
43  
44  
45  
46  
47

48 **Fig 3:** Peer Navigators community outreach workflow  
49  
50  
51  
52  
53  
54  
55

56 **Fig 4:** Mobile/Fixed clinics service workflow  
57  
58  
59  
60

## Randomisation

We defined cluster as a pair of peer navigator (PN) who live and work in one of the 24 administrative areas that were included in the trial. Peer navigators were pre-assigned to 24 areas before the randomisation process. Using data from our recent DREAMS (combination HIV prevention) Impact Evaluation study which collected data from a representative sample of young women residing in the study areas, a restricted randomisation was applied to get balanced covariates (location, HIV testing prevalence and uptake of DREAMS combination HIV prevention by adolescent girls and young women) across the 3 arms. We generated a random set of possible 100,000 allocation options. After applying all 3 restrictions, a total of 47, 924 possible allocations remained, and a random number was generated and assigned to each allocation option. The random numbers were ranked from lowest to highest and the allocation option with the first rank was then selected. A randomisation list with intervention arms named alphabetically (A, B & C) was generated.

Following the statistical randomisation, a public randomisation was conducted where peer navigators were divided into three groups (A, B & C). Each group had 16 allocated PNs and 3 floating ones. Each group chose a suitable name and a leader who represented them. Group leads picked a concealed number to determine the order of picking their study arm from a box. The facilitator shook the box so to make sure that each concealed arm in the box had an equal chance of being picked. Lastly, the leaders were asked to open and announce the arms of their respective groups to the bigger group.

## Blinding

The statistician and clinical staff did not participate in the public randomisation with peer navigators and they will remain blinded until the results of the study have been finalised.

## Sample size calculations

Based on 2017 data, we estimated ~500 age eligible 18-30 years olds live in each peer navigator team catchment area, of whom we anticipated at least 200, 18-24-year-old females will be handed a study pack (so cluster size at least 200). We estimated this based on 2 peer navigators working approximately 1000 hours over the study period per cluster. We estimated that they would reach 2 young adults per each 4 hour of work and at least one would accept a study pack. We calculated the sample size calculation using the primary outcome, the rate of linkage after 90 days among women ages 18-24 years. Using our existing data on uptake of HIV testing in the DREAMS interventions as well as our data on uptake of testing and linkage to HIV care in the demographic surveillance rounds of, we estimated that 1 woman would link per 6 months of peer navigators outreach work time in the standard of care. With 8 peer educator pairs (or clusters) per arm and a cluster coefficient of variation (k) of 0.25, we will have 80% power to detect a 100% increase in rate from 1 woman to 2 women per 6 months of follow-up, and 90% power to detect a 150% increase from 1 woman to 2.5 women per 6 months of follow-up. We have chosen policy and clinically relevant increases in linkage to care. Assuming additional clustering of the outcome within peer educators and increasing the coefficient of variation (k) to 0.35, we have 80% power to detect a 150% increase in rate from 1 woman to 2.5 women per 6 months of follow-up. All sample size calculations assume two-tailed statistical tests with  $\alpha=0.05$ .

### Process evaluation

Our aim is to assess the acceptability, feasibility, and fidelity of the peer delivery model in each arm in facilitating linkage to care. We compare the pattern of recruitment per arm and assess the proportion of hard-to-reach AGYW (aged 18-24 years) - defined as out of school, recently migrated and those who live in remote areas linked to care in the three study arms. We will also explore potential unintended consequences and ethical issues that arise during peer referral and HIVST and ascertain what works for whom and when to be able to modify the intervention to improve equitable reach and coverage. Specifically, we will explore the reach of network recruitment compared to peer outreach work, in terms of reaching more vulnerable groups (out of school, recently migrated, and those who live more remotely). Entrenched in realist evaluation, this process evaluation uses a mixed method approach (quantitative and qualitative research techniques) to investigate implementation, mechanisms of impact and contextual factors, informed by the United Kingdom medical research council (MRC) guide<sup>43</sup> and wider implementation science literature with a focus on fidelity, reach and acceptability<sup>44</sup>.

### Cost-effectiveness evaluation

We compare the costs in intervention and control arms. Cost per case linked to PrEP eligibility assessment (HIV-) and cost per case started on ART (HIV+). To establish costs, we are using both a bottom-up ingredient-based costing approach and a top-down costing approach using the study budgets and expenditure reports. Specifically, we calculate and cost the actual time spent by peer-navigators in each arm for each person linked to care and prevention.

### Data Collection

#### Participant Survey and Clinic Linkage:

A short survey (service recipient questionnaire) is administered to consenting individuals participating in the study. The questionnaire collects data on participant's demographic information and coupon identification. The data is captured on REDCap on a tablet. The survey takes approximately 5 minutes to complete and is administered in both English and isiZulu. The primary outcome of linkage is measured through identifying the consenting eligible young women who link to care through the 11 PHCs and the mobile clinics. We use an algorithm to identify which arm the individual came from, including the barcode on the referral slip they bring, the colour of the referral slips or HIVST pack, their area of residence, and the identity of the peer-navigator that recruited them.

#### Programmatic Data:

In addition to the survey, we collect the programme data records from the peer navigators daily reporting of their outreach activities. This includes the number of young people they have counselled and the numbers they have referred to services and the brief service recipient data they have collected on those who have received referral slips or HIVST packs. We use the programme data in an aggregate way (disaggregated only by gender) to understand the reach and coverage of the programme and compare that with those who link to care. We also use data on changes in self-reported HIVST and linkage services collected through the population intervention surveillance platform.



### Participant in-depth interviews (IDIs):

IDIs are being conducted with the peer navigators (n= 30), clinical team (n= 6) stationed in clinics in the participating communities and a purposive sample of young women aged 18-24 years (including young men n= 45; 30 females[10 per arm], 15 males [5 per arm]) across the three arms and clinics. The interviews are conducted by trained social scientists fluent in English and isiZulu and take approximately 60 minutes in length depending on the participant's responses, and this enables the researchers to understand, contextualize and explore participants perceptions of the study and some of the issues emanating from the trial. The small number of IDI participants in qualitative study is allowed since deeper meanings of concepts and thematic areas are explored. To limit disturbances and ensure privacy, the IDIs are conducted in a private space suitable for the participant, and audio recorded with interviewees' consents. Prior to the interview, participants are encouraged to use pseudo names instead of their real names.

### Statistical Analysis

The analysis of primary outcome follows an intention-to-treat (ITT) and per-protocol approaches. The analysis of secondary outcomes will be undertaken using per-protocol approach only. The primary outcome compares the difference between the rate of linkage of 18-24-year-old women to HIV confirmatory HIV testing, ART (if HIV positive) or PrEP counselling (if HIV negative). The rate is defined as the number of linkages per month of peer navigator outreach activities. The numerator is defined as the number of young women aged 18-24 who attend clinic for confirmatory HIV testing, PrEP counselling or ART, following HIV-ST distribution or peer navigator referral to HIV testing, treatment and prevention services. The denominator for intention-to-treat analysis (ITT) is the entire time (study duration) spent by peer navigators doing their peer outreach work. For the on-treatment analysis, we will use the actual time spent by peer navigators on distributing packs in each arm. The time worked by each peer navigator will be combined to get the total time per pair of peer navigator. The difference in rate of linkage between the study arms will be calculated - incentivised HIVST delivery through peer network and direct distribution of HIVST will be compared to standard of care.

Since we randomised the pairs of peer navigator (clusters), the rate of linkage will be calculated for each pair of peer navigator using aggregate data for each cluster. Since the number of clusters are small, the effect of the intervention will be estimated using a two-stage approach based on cluster-level summaries<sup>45</sup>. The cluster-level approach, although less statistically efficient than methods based on individual level regression, is more robust when there are a relatively small number of clusters. All analyses will be performed using STATA version 15 (StataCorp LP, College Station, Texas USA).

Cluster-level linkage rates will be calculated and used to estimate the unadjusted rate ratio and its 95% confidence interval for the effect of each intervention arm compared with the standard of care; the mean difference in linkage rates between each arm and standard of care, and against each-other will be assessed using a t-test. A rate ratio adjusting for substantial covariate imbalance at baseline will also be calculated, using a two-stage process; all covariates will be pre-specified in the analysis plan. To identify covariates for adjustment, baseline characteristics of each arm will be presented, and the size of the difference of covariates known to be associated with the outcome will be assessed quantitatively.

As part of the exploratory analysis, we will perform a (i) subgroup analysis by gender and area and (ii) two intervention arms will be compared to one another (incentivised HIVST delivery through peer network approach will also be compared to direct distribution of HIVST approach). To expand on this, the data



1  
2  
3 from the client survey captured on REDCap dashboard will be exported into STATA, cleaned and analysed.  
4 All reporting will conform to CONSORT guidance for cluster randomised trials<sup>44,45</sup>.  
5  
6  
7

### 8 **Qualitative analysis**

9  
10 Nvivo software will be used for categorisation and coding of emerging themes from the interview  
11 transcripts. Identified themes (including participants' quotes) and interview transcripts will be reviewed  
12 and compared by the research team for inconsistencies and adequate representation of participants'  
13 views. Emerging themes that address the key focus of the study will be examined and analysed following  
14 an interpretivist approach<sup>46</sup>.  
15  
16

### 17 **Adverse events reporting**

18 HIV testing, including HIVST, is well established and known to have a high level of safety. However,  
19 harmful reactions can occur. Adverse events (AE) related to HIVST include all undesirable experiences  
20 that result directly from use of the HIVST kit itself or as a reaction from others due to the presence of  
21 the kit, use of the kit or results produced from the kit. AEs can be from one person to another, or a  
22 person to themselves, and can occur before, during or after self-testing. We rely on participants to  
23 report any AEs to the study staff or through the hotline provided on the referral slip. Also, during PrEP  
24 resupply and monitoring visits, participants complete a standardised symptom screening  
25 questionnaire for adverse effects of PrEP as per South African clinical guidelines. Furthermore, all  
26 participants will receive regular creatinine tests to monitor their renal function. Participants who have  
27 severe (grade 3/4) adverse effects and serious adverse effects, are referred to the study clinician for  
28 medical evaluation. All participants who experience adverse events receive follow-up until the  
29 adverse event is resolved.  
30  
31  
32  
33  
34

35 AEs and Serious Adverse Events (SAE) are captured through the process evaluation and community  
36 engagement units and the telephone hotline. In addition, peer navigators and clinic staff log AEs using  
37 our incident reporting form for up to 12 months after the start of the intervention. Reported AEs  
38 and SAEs are monitored, categorised based on an established grading system. SAEs are logged, with  
39 the Principal Investigator to evaluate the SAE for seriousness and likely relationship to the  
40 intervention. Related SAEs are reported to UKZN and LSHTM Ethics Review Boards. All SAEs are  
41 reported regularly through six-month progress reports to TAG members, local and international  
42 collaborators. Annual reports with full listings of SAEs will be submitted to Ethics Review Boards.  
43  
44  
45  
46  
47

### 48 **Data management**

49 Quantitative data are collected directly on the study tablet via REDCap database and resides within a  
50 single MySQL database server within a secure server cluster. Study-specific electronic laboratory results  
51 are transferred directly to a secured server for storage. Qualitative data are stored in the form of Word  
52 files or in Excel both of which can be uploaded into Nvivo qualitative data management programme. The  
53 use of MS Word will ensure that data can in future be shared for use in different analysis programmes.  
54  
55  
56  
57  
58  
59  
60

1  
2  
3 These files will be kept on a secure access-controlled folder on a secured server. Qualitative audio files  
4 will be destroyed once they have been transcribed, translated and quality controlled.  
5

### 6 **Patient and public involvement**

7  
8 Although we did not involve patients or the public in the design of the study, findings from previous  
9 studies conducted within the community were useful during the study design phase. The study was also  
10 presented to the community advisory board (CAB) and the district department of health for comments  
11 before it was submitted to IRBs for ethics approval. The results of the study will be shared with the peer  
12 navigators and the research community through community dialogues and the community advisory  
13 board.  
14  
15

## 16 **ETHICS AND DISSEMINATION**

### 17 **Ethical consideration: confidentiality and informed consent**

18  
19 All staff (including peer navigators) have been provided with training on research ethics such as  
20 confidentiality, voluntary participation and good clinical practices. Anonymity and confidentiality are  
21 ensured at all levels of the research process, and none of our reports, presentations or articles will contain  
22 study participants identifying information. Pseudonyms are used when reporting the data particularly  
23 qualitative data. Each participant is assigned a unique non-identifying participant identification number.  
24 Prior to their involvement in the study, participants are provided with adequate information about the  
25 study and are allowed to ask questions for clarifications. Voluntary informed consent is collected only if  
26 participants have the full understanding of the study procedures. A copy of the signed consent form is  
27 given to them. Participants are informed about the importance of the confirmatory diagnostic testing. An  
28 anonymous support hotline is provided on the referral slips should they need to discuss their HIV status,  
29 counselling and further linkage to HIV care or other health services. All participant irrespective of their  
30 consent to participating in the study are eligible for the clinical services provided through the study. The  
31 study was approved by and conforms to the ethical guidelines and standards of UKZN, LSHTM and WHO.  
32  
33  
34  
35  
36

### 37 **Dissemination plan**

38  
39 The results of this study will be disseminated through traditional academic channels (peer reviewed  
40 journal publications) as well as on different information dissemination platforms such as conferences,  
41 workshops, community meetings and symposia. The results of the study will also be presented at Self-  
42 Testing Africa (STAR) consortium meetings and will be included in the WHO guidelines. The results of the  
43 study will be shared with the peer navigators and the research community through community dialogues  
44 and the AHRI community advisory board. A detailed findings report will be shared with the Department  
45 of Health and other stakeholders to inform policy.  
46  
47

## 48 **DISCUSSION**

49  
50 Despite the burden of HIV and the availability of free HIV testing and treatment in our local PHCs, HIV  
51 status knowledge remains low amongst young people < 30 years<sup>2</sup>. Several complex barriers (e.g. stigma,  
52 confidentiality, family rejection, waiting times and lack of youth friendly services etc.) impeding on young  
53 people's access to HIV care services were identified in a formative research we completed in 2018<sup>2,38</sup>.  
54 Studies including systematic reviews<sup>13,19</sup> have shown HIVST to be a promising alternative HIV testing  
55  
56  
57

option because it is private, flexible and an efficient method. However, there is limited evidence on the use of HIVST to improve linkage to prevention such as PrEP. The overarching goal of this trial is to address the gap in HIV testing and linkage to HIV prevention among young women aged 18-24 years. This goal will be achieved through the assessment of two HIVST delivery models (incentivized peer network versus direct distribution by peer navigators) compared to the standard of care of peer navigator only.

A major strength of this study is the development of a theoretically derived intervention that can be implemented through existing cadre of community caregivers and peer to peer networks across SSA<sup>47-50</sup>. If found to be effective in increasing HIV testing uptake and prevention, the intervention is designed to be rolled out. Also, using a rigorous cost effectiveness analysis will allow SA policy makers to evaluate the cost-benefit ratio of using the different models of distribution in different settings. Furthermore, by collecting rigorous data on linkage to prevention both through the trial and from our surveillance infrastructure, we can understand the potential population impact of the different methods of HIVST distribution on knowledge of status and linkage to care and prevention. Ultimately this will provide evidence of the potential of the intervention to attract young people into the HIV care and prevention cascade and inform the evidence base to reduce the mortality and morbidity in youth. Lastly, rigorous process evaluation and collection of data on all adverse events and social harms will provide important data around some of the concerns about HIVST, i.e. the potential for coercive test, depression, anxiety, suicidality or intimate partner violence.

In order to reduce the risk of contamination due to the proximity of the areas and the nature of the intervention, we have piloted several methods including the use of referral slips with unique codes and colour coordinated packs to identify the arm individuals come from when they link to care. Previous data from nested cohorts that we have followed up in our area has shown that young people rarely migrate within our surveillance area given that only 220 of 2 184 young people < 25 years cohorts moved from one cluster to another in 2017/2018. Furthermore, the process evaluation will help us understand the delivery model in each arm as well as unintended consequences and ethical issues that arise during the study and ascertain what works for whom and when to be able to modify the intervention to improve equitable reach and coverage.

In conclusion, the results of this trial are expected to contribute to WHO guidelines and informed policy aimed at implementation and scale-up of HIVST and PrEP in South Africa. Also, this study will address critical gaps in the literature on HIV testing and prevention interventions for young people particularly females aged 18-24 years in Southern Africa.

#### **Acknowledgements:**

The authors acknowledge TAG of the STAR initiative and AHRI HIV Prevention Multilevel Group including the research assistants, peer navigators, clinical team, managers and research administrators for their commitment to the study. We also extend our appreciation to our research community including the community advisory boards in uMkhanyakude district.

### Authors Contributions:

MS and LC conceived the study. OA, MS, CH, JD, JS, LC, FC, NC, NO, PM, MTN MN designed the study. OA and MS wrote the first draft of the manuscript. OA, MS, LC, JS, JD, CH, TS, FC, MN, NC, KH, CJ, PM, MTN, and NO read and critically revised the manuscript. All authors read and approved the final manuscript.

### Funding:

This study is part of the Self-Testing Africa (STAR) initiative funded by the Unitaid (grant number: PO#10140-0-600). MS is partly supported by the US National Institute of Health (NIH) R01 (award no: 5R01MH114560-03) that supports a peer led outreach team of navigators to support uptake and retention of adolescents and young adults in existing HIV prevention. Africa Health Research Institute is supported by core funding from the Wellcome Trust [Core grant number (082384/Z/07/Z)]. The funders were not involved in the design of the study.

### Competing interests:

None declared.

### Ethics approval:

Ethical approval was obtained for the study from Institutional Review Boards (IRB) of the World Health Organisation, Switzerland (**Protocol ID: STAR CRT, South Africa**), London School of Hygiene and Tropical Medicine, UK (**Reference no: 15990 - 1**), University of KwaZulu-Natal (**BFC311/18**), and the KwaZulu-Natal Department of Health (**NHRD Reference no: KZ\_201901\_012**), South Africa. The study was also approved by the community advisory board (CAB) representing the research community before it was submitted to IRBs. **Trial registration number:** Clinicaltrials.gov - NCT03751826. Protocol date: 17 January 2019.

### Data sharing statement:

On completion of the trial, de-identified data will be available through the Africa Health Research Institute, South Africa (AHRI) data access repository upon request. Requests for data sharing are reviewed by the data custodian and a Data Sharing committee at AHRI. After approval, all data sharing, even those without identifiers, will be through a secure and password-controlled data sharing site, with access strictly limited to transcripts that are relevant to the analysis planned. Users will be asked to abide by the AHRI Data Access and Sharing Policy.

### REFERENCES

1. HSRC. *South African National HIV Prevalence, Incidence, Behaviour and Communication Survey 2017*. Pretoria, South Africa: Human Science Research Council July, 2018 2018.
2. Adeagbo O, Herbst C, Dlamini N, et al. The 'Missing Middle' in HIV Treatment Cascade: Ensuring Men's and Young People's access to HIV Care in KwaZulu-Natal, South Africa. Association of Social Science and Humanities in HIV , 2018 International AIDS Society Pre-conference 21 July 2018, 2018; Amsterdam.

3. M S, N C, N M, et al. Persistently high incidence of HIV in adolescent girls and young women in rural KwaZulu-Natal, South Africa: Lessons for Determined Resilient, Empowered, AIDS free, Mentored and Safe (DREAMS) multilevel HIV prevention scale-up. Paper presented at: AIDS Impact; 17 November 2017, 2017; Cape Town, South Africa.
4. Organization WH. WHO expands recommendation on oral preexposure prophylaxis of HIV infection (PrEP): Policy brief. *WHO, Geneva*. 2015.
5. (NDoH) NDoHSA. *National Policy on HIV Pre Exposure Prophylaxis (PrEP) and test and treat (T&T)*. Pretoria, South Africa 2016.
6. Huerga H, Van Cutsem G, Farhat JB, et al. Progress towards the UNAIDS 90–90–90 goals by age and gender in a rural area of KwaZulu-Natal, South Africa: a household-based community cross-sectional survey. *BMC public health*. 2018;18(1):303.
7. Carrasco MA, Fleming P, Wagman J, Wong V. Toward 90-90-90: identifying those who have never been tested for HIV and differences by sex in Lesotho. *AIDS care*. 2018;30(3):284-288.
8. Iwuji C, Orne-Gliemann J, Larmarange J, et al. Universal test and treat and the HIV epidemic in rural South Africa: a phase 4, open-label, community cluster randomised trial. *The lancet HIV*. 2018;5(3):e116-e125.
9. Plazy M, Farouki KE, Iwuji C, et al. Access to HIV care in the context of universal test and treat: challenges within the ANRS 12249 TasP cluster-randomized trial in rural South Africa. *Journal of the International AIDS Society*. 2016;19(1):20913.
10. Moshabela M, Zuma T, Orne-Gliemann J, et al. “It is better to die”: experiences of traditional health practitioners within the HIV treatment as prevention trial communities in rural South Africa (ANRS 12249 TasP trial). *AIDS care*. 2016;28(sup3):24-32.
11. Boyer S, Iwuji C, Gosset A, et al. Factors associated with antiretroviral treatment initiation amongst HIV-positive individuals linked to care within a universal test and treat programme: early findings of the ANRS 12249 TasP trial in rural South Africa. *AIDS care*. 2016;28(sup3):39-51.
12. Spielberg F, Levine RO, Weaver M. Self-testing for HIV: a new option for HIV prevention? *The Lancet infectious diseases*. 2004;4(10):640-646.
13. Krause J, Subklew-Sehume F, Kenyon C, Colebunders R. Acceptability of HIV self-testing: a systematic literature review. *BMC public health*. 2013;13(1):735.
14. Choko AT, Desmond N, Webb EL, et al. The uptake and accuracy of oral kits for HIV self-testing in high HIV prevalence setting: a cross-sectional feasibility study in Blantyre, Malawi. *PLoS medicine*. 2011;8(10):e1001102.
15. Makusha T, Knight L, Taegtmeier M, et al. HIV self-testing could “revolutionize testing in South Africa, but it has got to be done properly”: perceptions of key stakeholders. *PLoS one*. 2015;10(3):e0122783.
16. Knight L, Makusha T, Lim J, Peck R, Taegtmeier M, van Rooyen H. “I think it is right”: a qualitative exploration of the acceptability and desired future use of oral swab and finger-prick HIV self-tests by lay users in KwaZulu-Natal, South Africa. *BMC research notes*. 2017;10(1):486.
17. Spielberg F, Critchlow C, Vittinghoff E, et al. Home collection for frequent HIV testing: acceptability of oral fluids, dried blood spots and telephone results. *Aids*. 2000;14(12):1819-1828.
18. Belza MJ, Rosales-Statkus ME, Hoyos J, et al. Supervised blood-based self-sample collection and rapid test performance: a valuable alternative to the use of saliva by HIV testing programmes with no medical or nursing staff. *Sex Transm Infect*. 2012;sextrans-2011-050131.
19. Harichund C, Karim QA, Kunene P, Simelane S, Moshabela M. Exploring factors that influence the integration of HIVST with HCT using a qualitative comparative cross-over design in KwaZulu-Natal, South Africa. *Global public health*. 2019:1-13.
20. Gaydos CA, Hsieh Y-H, Harvey L, et al. Will patients “opt in” to perform their own rapid HIV test in the emergency department? *Annals of emergency medicine*. 2011;58(1):S74-S78.



21. Kalibala S, Tun W, Muraah W, Cherutich P, Oweya E, Oluoch P. Knowing myself first': feasibility of self-testing among health workers in Kenya. *Nairobi: Population Council*. 2011.
22. Lee VJ, Tan SC, Earnest A, Seong PS, Tan HH, Leo YS. User acceptability and feasibility of self-testing with HIV rapid tests. *JAIDS Journal of Acquired Immune Deficiency Syndromes*. 2007;45(4):449-453.
23. WHO. *Guidelines on HIV self-testing and partner notification*. Switzerland: WHO;2016.
24. Kapaku K, Neuman M, Maluzi K, et al. Is OraQuick HIV-self-testing valid among intended users? Analysis from a clinical performance study in Lusaka, Zambia. *International AIDS Society (IAS 2017) Paris, France*. 2017.
25. Cowan FM, Delany-Moretlwe S, Sanders EJ, et al. PrEP implementation research in Africa: what is new? *Journal of the International AIDS Society*. 2016;19:21101.
26. Van Damme L, Corneli A, Ahmed K, et al. Preexposure prophylaxis for HIV infection among African women. *New England Journal of Medicine*. 2012;367(5):411-422.
27. Marrazzo JM, Ramjee G, Richardson BA, et al. Tenofovir-based preexposure prophylaxis for HIV infection among African women. *New England Journal of Medicine*. 2015;372(6):509-518.
28. Yun K, Xu J-j, Zhang J, et al. Female and younger subjects have lower adherence in PrEP trials: a meta-analysis with implications for the uptake of PrEP service to prevent HIV. *Sex Transm Infect*. 2017;sextrans-2017-053217.
29. Kim S-H, Gerver SM, Fidler S, Ward H. Adherence to antiretroviral therapy in adolescents living with HIV: systematic review and meta-analysis. *AIDS (London, England)*. 2014;28(13):1945.
30. Sharma M, Barnabas RV, Celum C. Community-based strategies to strengthen men's engagement in the HIV care cascade in sub-Saharan Africa. *PLoS medicine*. 2017;14(4):e1002262.
31. Van Rooyen H, Barnabas RV, Baeten JM, et al. High HIV testing uptake and linkage to care in a novel program of home-based HIV counseling and testing with facilitated referral in KwaZulu-Natal, South Africa. *Journal of acquired immune deficiency syndromes (1999)*. 2013;64(1):e1.
32. Kanters S, Park JJ, Chan K, et al. Interventions to improve adherence to antiretroviral therapy: a systematic review and network meta-analysis. *The Lancet HIV*. 2017;4(1):e31-e40.
33. Pettifor A, Nguyen NL, Celum C, Cowan FM, Go V, Hightow-Weidman L. Tailored combination prevention packages and PrEP for young key populations. *Journal of the International AIDS Society*. 2015;18(2S1).
34. Choko AT, MacPherson P, Webb EL, et al. One Year Outcomes Following Community-Based HIV Self-Testing: A Prospective Study in Malawi. Conference on Retroviruses and Opportunistic Infections 2014; United States.
35. Funnell SC, Rogers PJ. *Purposeful program theory: Effective use of theories of change and logic models*. Vol 31: John Wiley & Sons; 2011.
36. Baral S, Logie CH, Grosso A, Wirtz AL, Beyrer C. Modified social ecological model: a tool to guide the assessment of the risks and risk contexts of HIV epidemics. *BMC public health*. 2013;13(1):482.
37. Hargreaves JR, Delany-Moretlwe S, Hallett TB, et al. The HIV prevention cascade: integrating theories of epidemiological, behavioural, and social science into programme design and monitoring. *Lancet HIV*. 2016;3(7):e318-322.
38. Adeagbo O, Carina H, Blandford A, et al. Building Mobile Phone-connected Diagnostics: A Qualitative Study Exploring People's 'Candidacy' for Mobile Health-Supported HIV Testing and Care Services in Rural KwaZulu-Natal, South Africa. *Journal of medical Internet research*. 2019;21(9).
39. Adeagbo O, Herbst C, Dlamini N, et al. "If She Tests Negative, It Means I Am Also Negative": Men's Construction of HIV Testing in South Africa. *AIDS RESEARCH AND HUMAN RETROVIRUSES*. 2018;34:85-85.

- 1  
2  
3  
4  
5  
6  
7  
8  
9  
10  
11  
12  
13  
14  
15  
16  
17  
18  
19  
20  
21  
22  
23  
24  
25  
26  
27  
28  
29  
30  
31  
32  
33  
34  
35  
36  
37  
38  
39  
40  
41  
42  
43  
44  
45  
46  
47  
48  
49  
50  
51  
52  
53  
54  
55  
56  
57  
58  
59  
60
40. Nkosi B, Seeley J, Ngwenya N, et al. Exploring adolescents and young people's candidacy for utilising health services in a rural district, South Africa. *BMC Health Services Research*. 2019;19(1):195.
  41. Chan A-W, Tetzlaff JM, Altman DG, et al. SPIRIT 2013 statement: defining standard protocol items for clinical trials. *Annals of internal medicine*. 2013;158(3):200-207.
  42. Harris PA, Taylor R, Thielke R, Payne J, Gonzalez N, Conde JG. Research electronic data capture (REDCap)—a metadata-driven methodology and workflow process for providing translational research informatics support. *Journal of biomedical informatics*. 2009;42(2):377-381.
  43. Moore GF, Audrey S, Barker M, et al. Process evaluation of complex interventions: Medical Research Council guidance. *bmj*. 2015;350:h1258.
  44. Jacobs C, Michelo C, Moshabela M. Implementation of a community-based intervention in the most rural and remote districts of Zambia: a process evaluation of safe motherhood action groups. *Implementation science*. 2018;13(1):74.
  45. Hayes RJ, Moulton LH. *Cluster randomised trials*. Chapman and Hall/CRC; 2017.
  46. Denzin NK, Lincoln YS. *The Sage handbook of qualitative research*. Sage; 2011.
  47. Onyango MA, Adu-Sarkodie Y, Agyarko-Poku T, et al. "It's all about making a life": poverty, HIV, violence, and other vulnerabilities faced by young female sex workers in Kumasi, Ghana. *JAIDS Journal of Acquired Immune Deficiency Syndromes*. 2015;68:S131-S137.
  48. Geibel S, King'ola N, Temmerman M, Luchters S. The impact of peer outreach on HIV knowledge and prevention behaviours of male sex workers in Mombasa, Kenya. *Sex Transm Infect*. 2012;88(5):357-362.
  49. Oldenburg CE, Biello KB, Colby D, et al. Engagement with peer health educators is associated with willingness to use pre-exposure prophylaxis among male sex workers in Ho Chi Minh City, Vietnam. *AIDS patient care and STDs*. 2014;28(3):109-112.
  50. Ford K, Wirawan D, Suastina W, Reed B, Muliawan P. Evaluation of a peer education programme for female sex workers in Bali, Indonesia. *International journal of STD & AIDS*. 2000;11(11):731-733.



1  
2  
3  
4  
5  
6  
7  
8  
9  
10  
11  
12  
13  
14  
15  
16  
17  
18  
19  
20  
21  
22  
23  
24  
25  
26  
27  
28  
29  
30  
31  
32  
33  
34  
35  
36  
37  
38  
39  
40  
41  
42  
43  
44  
45  
46  
47  
48  
49  
50  
51  
52  
53  
54  
55  
56  
57  
58  
59  
60

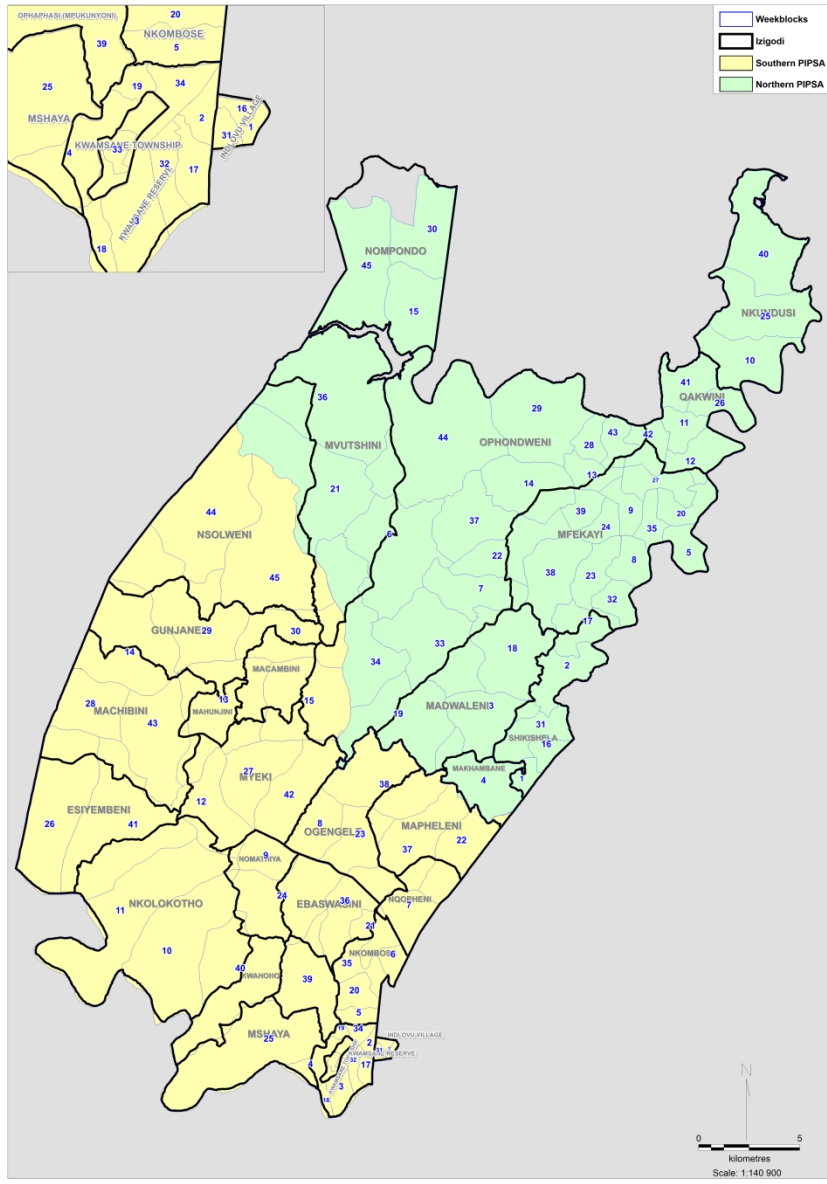

296x419mm (300 x 300 DPI)

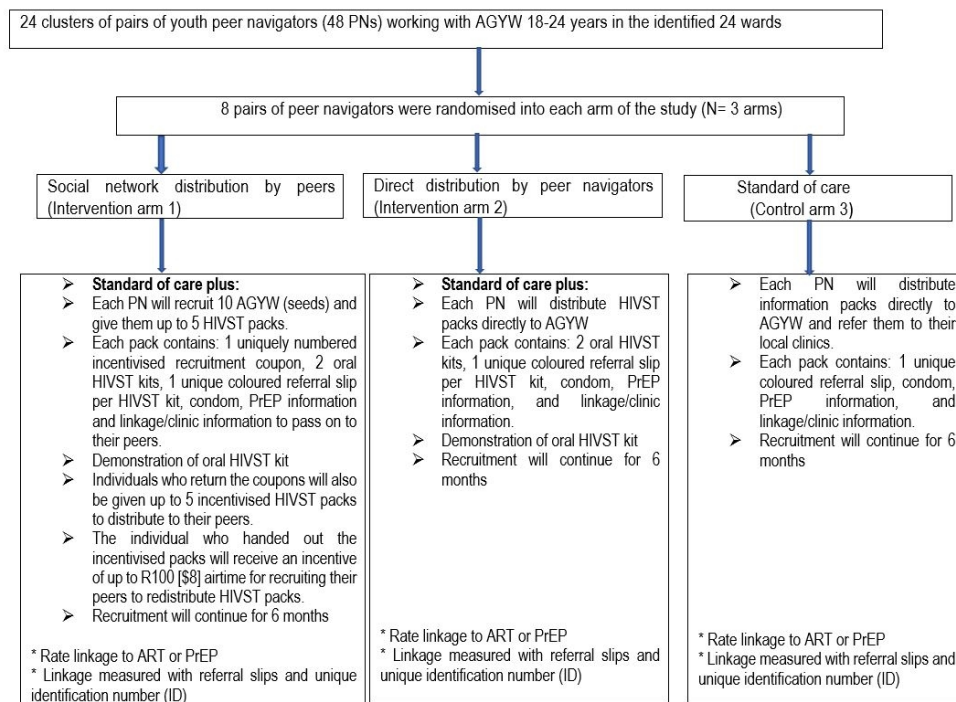

289x214mm (96 x 96 DPI)

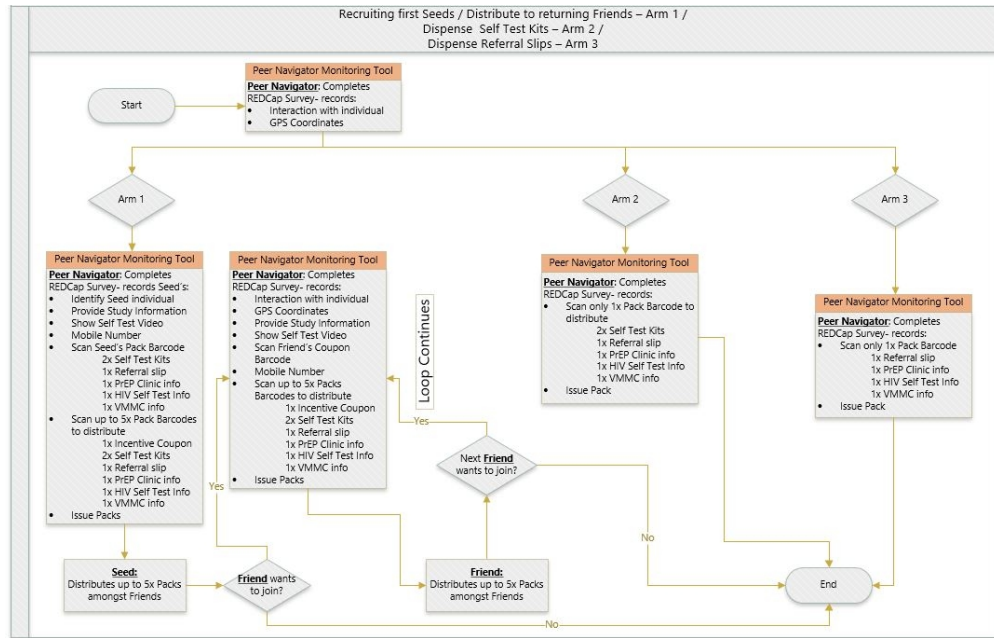

283x180mm (96 x 96 DPI)

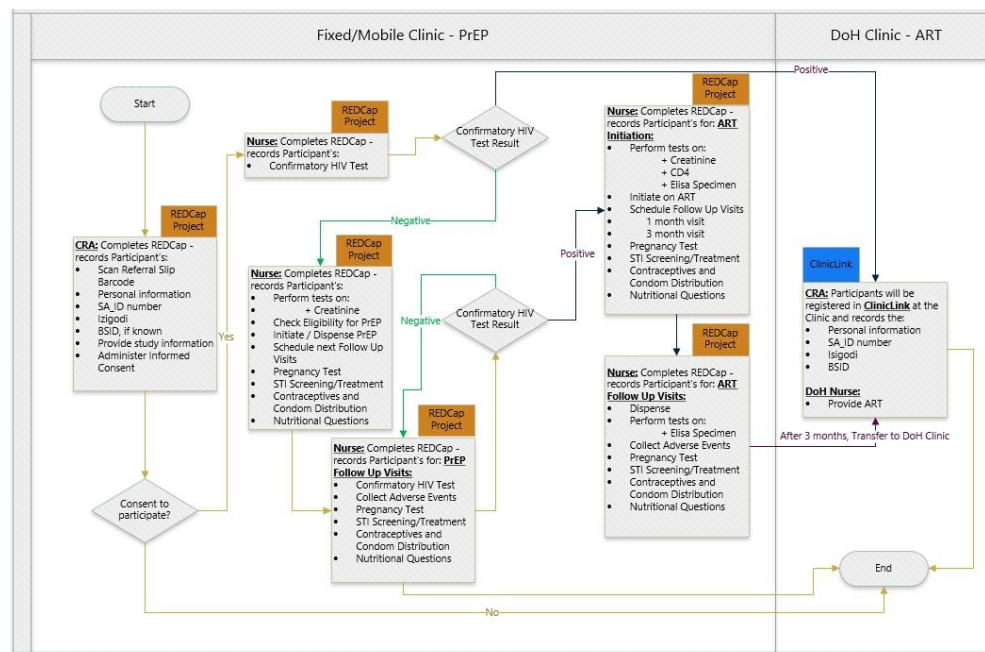

280x184mm (96 x 96 DPI)

# Reporting checklist for protocol of a clinical trial.

Based on the SPIRIT guidelines.

## Instructions to authors

Complete this checklist by entering the page numbers from your manuscript where readers will find each of the items listed below.

Your article may not currently address all the items on the checklist. Please modify your text to include the missing information. If you are certain that an item does not apply, please write "n/a" and provide a short explanation.

Upload your completed checklist as an extra file when you submit to a journal.

In your methods section, say that you used the SPIRIT reporting guidelines, and cite them as:

Chan A-W, Tetzlaff JM, Altman DG, Laupacis A, Gøtzsche PC, Krleža-Jerić K, Hróbjartsson A, Mann H, Dickersin K, Berlin J, Doré C, Parulekar W, Summerskill W, Groves T, Schulz K, Sox H, Rockhold FW, Rennie D, Moher D. SPIRIT 2013 Statement: Defining standard protocol items for clinical trials. *Ann Intern Med.* 2013;158(3):200-207

|                                   | Reporting Item                                                                                                                  | Page Number |
|-----------------------------------|---------------------------------------------------------------------------------------------------------------------------------|-------------|
| <b>Administrative information</b> |                                                                                                                                 |             |
| Title                             | <a href="#">#1</a> Descriptive title identifying the study design, population, interventions, and, if applicable, trial acronym | 1           |

|    |                    |                     |                                                        |                 |
|----|--------------------|---------------------|--------------------------------------------------------|-----------------|
| 1  | Trial registration | <a href="#">#2a</a> | Trial identifier and registry name. If not yet         | 2               |
| 2  |                    |                     | registered, name of intended registry                  |                 |
| 3  |                    |                     |                                                        |                 |
| 4  |                    |                     |                                                        |                 |
| 5  |                    |                     |                                                        |                 |
| 6  |                    |                     |                                                        |                 |
| 7  |                    | <a href="#">#2b</a> | All items from the World Health Organization Trial     | (see below for  |
| 8  |                    |                     | Registration Data Set                                  | specific items) |
| 9  |                    |                     |                                                        |                 |
| 10 |                    |                     |                                                        |                 |
| 11 |                    |                     |                                                        |                 |
| 12 | Protocol version   | <a href="#">#3</a>  | Date and version identifier                            | 2               |
| 13 |                    |                     |                                                        |                 |
| 14 |                    |                     |                                                        |                 |
| 15 | Funding            | <a href="#">#4</a>  | Sources and types of financial, material, and other    | 17              |
| 16 |                    |                     | support                                                |                 |
| 17 |                    |                     |                                                        |                 |
| 18 |                    |                     |                                                        |                 |
| 19 |                    |                     |                                                        |                 |
| 20 | Roles and          | <a href="#">#5a</a> | Names, affiliations, and roles of protocol             | 1, 17           |
| 21 | responsibilities:  |                     | contributors                                           |                 |
| 22 |                    |                     |                                                        |                 |
| 23 | contributorship    |                     |                                                        |                 |
| 24 |                    |                     |                                                        |                 |
| 25 |                    |                     |                                                        |                 |
| 26 |                    |                     |                                                        |                 |
| 27 |                    |                     |                                                        |                 |
| 28 | Roles and          | <a href="#">#5b</a> | Name and contact information for the trial sponsor     | 17              |
| 29 | responsibilities:  |                     |                                                        |                 |
| 30 |                    |                     |                                                        |                 |
| 31 | sponsor contact    |                     |                                                        |                 |
| 32 |                    |                     |                                                        |                 |
| 33 | information        |                     |                                                        |                 |
| 34 |                    |                     |                                                        |                 |
| 35 |                    |                     |                                                        |                 |
| 36 |                    |                     |                                                        |                 |
| 37 |                    |                     |                                                        |                 |
| 38 | Roles and          | <a href="#">#5c</a> | Role of study sponsor and funders, if any, in study    | 17              |
| 39 | responsibilities:  |                     | design; collection, management, analysis, and          |                 |
| 40 |                    |                     | interpretation of data; writing of the report; and the |                 |
| 41 | sponsor and funder |                     | decision to submit the report for publication,         |                 |
| 42 |                    |                     | including whether they will have ultimate authority    |                 |
| 43 |                    |                     | over any of these activities                           |                 |
| 44 |                    |                     |                                                        |                 |
| 45 |                    |                     |                                                        |                 |
| 46 |                    |                     |                                                        |                 |
| 47 |                    |                     |                                                        |                 |
| 48 |                    |                     |                                                        |                 |
| 49 |                    |                     |                                                        |                 |
| 50 |                    |                     |                                                        |                 |
| 51 |                    |                     |                                                        |                 |
| 52 | Roles and          | <a href="#">#5d</a> | Composition, roles, and responsibilities of the        | N/A             |
| 53 | responsibilities:  |                     | coordinating centre, steering committee, endpoint      |                 |
| 54 |                    |                     | adjudication committee, data management team,          |                 |
| 55 | committees         |                     |                                                        |                 |
| 56 |                    |                     |                                                        |                 |
| 57 |                    |                     |                                                        |                 |
| 58 |                    |                     |                                                        |                 |
| 59 |                    |                     |                                                        |                 |
| 60 |                    |                     |                                                        |                 |

and other individuals or groups overseeing the trial,  
if applicable (see Item 21a for data monitoring  
committee)

## Introduction

|                                                 |                     |                                                                                                                                                                                                            |     |
|-------------------------------------------------|---------------------|------------------------------------------------------------------------------------------------------------------------------------------------------------------------------------------------------------|-----|
| Background and rationale                        | <a href="#">#6a</a> | Description of research question and justification for undertaking the trial, including summary of relevant studies (published and unpublished) examining benefits and harms for each intervention         | 2-3 |
| Background and rationale: choice of comparators | <a href="#">#6b</a> | Explanation for choice of comparators                                                                                                                                                                      | N/A |
| Objectives                                      | <a href="#">#7</a>  | Specific objectives or hypotheses                                                                                                                                                                          | 4   |
| Trial design                                    | <a href="#">#8</a>  | Description of trial design including type of trial (eg, parallel group, crossover, factorial, single group), allocation ratio, and framework (eg, superiority, equivalence, non-inferiority, exploratory) | 4-5 |

## Methods:

### Participants, interventions, and outcomes

|               |                    |                                                                                                          |   |
|---------------|--------------------|----------------------------------------------------------------------------------------------------------|---|
| Study setting | <a href="#">#9</a> | Description of study settings (eg, community clinic, academic hospital) and list of countries where data | 6 |
|---------------|--------------------|----------------------------------------------------------------------------------------------------------|---|



|    |                      |                                                                             |       |
|----|----------------------|-----------------------------------------------------------------------------|-------|
| 1  |                      | will be collected. Reference to where list of study                         |       |
| 2  |                      | sites can be obtained                                                       |       |
| 3  |                      |                                                                             |       |
| 4  |                      |                                                                             |       |
| 5  |                      |                                                                             |       |
| 6  | Eligibility criteria | <a href="#">#10</a> Inclusion and exclusion criteria for participants. If   | 8-9   |
| 7  |                      | applicable, eligibility criteria for study centres and                      |       |
| 8  |                      | individuals who will perform the interventions (eg,                         |       |
| 9  |                      | surgeons, psychotherapists)                                                 |       |
| 10 |                      |                                                                             |       |
| 11 |                      |                                                                             |       |
| 12 |                      |                                                                             |       |
| 13 |                      |                                                                             |       |
| 14 |                      |                                                                             |       |
| 15 |                      |                                                                             |       |
| 16 | Interventions:       | <a href="#">#11a</a> Interventions for each group with sufficient detail to | 5-6   |
| 17 |                      | allow replication, including how and when they will                         |       |
| 18 | description          | be administered                                                             |       |
| 19 |                      |                                                                             |       |
| 20 |                      |                                                                             |       |
| 21 |                      |                                                                             |       |
| 22 |                      |                                                                             |       |
| 23 | Interventions:       | <a href="#">#11b</a> Criteria for discontinuing or modifying allocated      | N/A   |
| 24 |                      | interventions for a given trial participant (eg, drug                       |       |
| 25 | modifications        | dose change in response to harms, participant                               |       |
| 26 |                      | request, or improving / worsening disease)                                  |       |
| 27 |                      |                                                                             |       |
| 28 |                      |                                                                             |       |
| 29 |                      |                                                                             |       |
| 30 |                      |                                                                             |       |
| 31 |                      |                                                                             |       |
| 32 |                      |                                                                             |       |
| 33 | Interventions:       | <a href="#">#11c</a> Strategies to improve adherence to intervention        | N/A   |
| 34 |                      | protocols, and any procedures for monitoring                                |       |
| 35 | adherence            | adherence (eg, drug tablet return; laboratory tests)                        |       |
| 36 |                      |                                                                             |       |
| 37 |                      |                                                                             |       |
| 38 |                      |                                                                             |       |
| 39 |                      |                                                                             |       |
| 40 |                      |                                                                             |       |
| 41 | Interventions:       | <a href="#">#11d</a> Relevant concomitant care and interventions that       | N/A   |
| 42 |                      | are permitted or prohibited during the trial                                |       |
| 43 | concomitant care     |                                                                             |       |
| 44 |                      |                                                                             |       |
| 45 |                      |                                                                             |       |
| 46 | Outcomes             | <a href="#">#12</a> Primary, secondary, and other outcomes, including       | 10-11 |
| 47 |                      | the specific measurement variable (eg, systolic                             |       |
| 48 |                      | blood pressure), analysis metric (eg, change from                           |       |
| 49 |                      | baseline, final value, time to event), method of                            |       |
| 50 |                      | aggregation (eg, median, proportion), and time                              |       |
| 51 |                      | point for each outcome. Explanation of the clinical                         |       |
| 52 |                      |                                                                             |       |
| 53 |                      |                                                                             |       |
| 54 |                      |                                                                             |       |
| 55 |                      |                                                                             |       |
| 56 |                      |                                                                             |       |
| 57 |                      |                                                                             |       |
| 58 |                      |                                                                             |       |
| 59 |                      |                                                                             |       |
| 60 |                      |                                                                             |       |

1 relevance of chosen efficacy and harm outcomes

2 is strongly recommended

|    |                           |                      |                                                     |
|----|---------------------------|----------------------|-----------------------------------------------------|
| 3  |                           |                      |                                                     |
| 4  |                           |                      |                                                     |
| 5  |                           |                      |                                                     |
| 6  | Participant timeline      | <a href="#">#13</a>  | Time schedule of enrolment, interventions           |
| 7  |                           |                      |                                                     |
| 8  |                           |                      | (including any run-ins and washouts),               |
| 9  |                           |                      |                                                     |
| 10 |                           |                      | assessments, and visits for participants. A         |
| 11 |                           |                      |                                                     |
| 12 |                           |                      | schematic diagram is highly recommended (see        |
| 13 |                           |                      |                                                     |
| 14 |                           |                      | Figure)                                             |
| 15 |                           |                      |                                                     |
| 16 |                           |                      |                                                     |
| 17 |                           |                      |                                                     |
| 18 | Sample size               | <a href="#">#14</a>  | Estimated number of participants needed to          |
| 19 |                           |                      |                                                     |
| 20 |                           |                      | achieve study objectives and how it was             |
| 21 |                           |                      |                                                     |
| 22 |                           |                      | determined, including clinical and statistical      |
| 23 |                           |                      |                                                     |
| 24 |                           |                      | assumptions supporting any sample size              |
| 25 |                           |                      |                                                     |
| 26 |                           |                      | calculations                                        |
| 27 |                           |                      |                                                     |
| 28 |                           |                      |                                                     |
| 29 |                           |                      |                                                     |
| 30 | Recruitment               | <a href="#">#15</a>  | Strategies for achieving adequate participant       |
| 31 |                           |                      |                                                     |
| 32 |                           |                      | enrolment to reach target sample size               |
| 33 |                           |                      |                                                     |
| 34 |                           |                      |                                                     |
| 35 | <b>Methods:</b>           |                      |                                                     |
| 36 |                           |                      |                                                     |
| 37 |                           |                      |                                                     |
| 38 | <b>Assignment of</b>      |                      |                                                     |
| 39 |                           |                      |                                                     |
| 40 | <b>interventions (for</b> |                      |                                                     |
| 41 |                           |                      |                                                     |
| 42 | <b>controlled trials)</b> |                      |                                                     |
| 43 |                           |                      |                                                     |
| 44 |                           |                      |                                                     |
| 45 | Allocation:               | <a href="#">#16a</a> | Method of generating the allocation sequence (eg,   |
| 46 |                           |                      |                                                     |
| 47 | sequence                  |                      | computer-generated random numbers), and list of     |
| 48 |                           |                      |                                                     |
| 49 | generation                |                      | any factors for stratification. To reduce           |
| 50 |                           |                      |                                                     |
| 51 |                           |                      | predictability of a random sequence, details of any |
| 52 |                           |                      |                                                     |
| 53 |                           |                      | planned restriction (eg, blocking) should be        |
| 54 |                           |                      |                                                     |
| 55 |                           |                      | provided in a separate document that is             |
| 56 |                           |                      |                                                     |
| 57 |                           |                      |                                                     |
| 58 |                           |                      |                                                     |
| 59 |                           |                      |                                                     |
| 60 |                           |                      |                                                     |

|    |                        |                                                                          |       |
|----|------------------------|--------------------------------------------------------------------------|-------|
| 1  |                        | unavailable to those who enrol participants or                           |       |
| 2  |                        |                                                                          |       |
| 3  |                        | assign interventions                                                     |       |
| 4  |                        |                                                                          |       |
| 5  |                        |                                                                          |       |
| 6  | Allocation             | <a href="#">#16b</a> Mechanism of implementing the allocation            | 9     |
| 7  |                        |                                                                          |       |
| 8  | concealment            | sequence (eg, central telephone; sequentially                            |       |
| 9  |                        |                                                                          |       |
| 10 | mechanism              | numbered, opaque, sealed envelopes), describing                          |       |
| 11 |                        |                                                                          |       |
| 12 |                        | any steps to conceal the sequence until                                  |       |
| 13 |                        |                                                                          |       |
| 14 |                        | interventions are assigned                                               |       |
| 15 |                        |                                                                          |       |
| 16 |                        |                                                                          |       |
| 17 |                        |                                                                          |       |
| 18 | Allocation:            | <a href="#">#16c</a> Who will generate the allocation sequence, who      | 9     |
| 19 |                        |                                                                          |       |
| 20 | implementation         | will enrol participants, and who will assign                             |       |
| 21 |                        |                                                                          |       |
| 22 |                        | participants to interventions                                            |       |
| 23 |                        |                                                                          |       |
| 24 |                        |                                                                          |       |
| 25 |                        |                                                                          |       |
| 26 | Blinding (masking)     | <a href="#">#17a</a> Who will be blinded after assignment to             | 9     |
| 27 |                        |                                                                          |       |
| 28 |                        | interventions (eg, trial participants, care providers,                   |       |
| 29 |                        |                                                                          |       |
| 30 |                        | outcome assessors, data analysts), and how                               |       |
| 31 |                        |                                                                          |       |
| 32 |                        |                                                                          |       |
| 33 | Blinding (masking):    | <a href="#">#17b</a> If blinded, circumstances under which unblinding is | N/A   |
| 34 |                        |                                                                          |       |
| 35 | emergency              | permissible, and procedure for revealing a                               |       |
| 36 |                        |                                                                          |       |
| 37 | unblinding             | participant's allocated intervention during the trial                    |       |
| 38 |                        |                                                                          |       |
| 39 |                        |                                                                          |       |
| 40 |                        |                                                                          |       |
| 41 | <b>Methods: Data</b>   |                                                                          |       |
| 42 |                        |                                                                          |       |
| 43 | <b>collection,</b>     |                                                                          |       |
| 44 |                        |                                                                          |       |
| 45 | <b>management, and</b> |                                                                          |       |
| 46 |                        |                                                                          |       |
| 47 | <b>analysis</b>        |                                                                          |       |
| 48 |                        |                                                                          |       |
| 49 |                        |                                                                          |       |
| 50 |                        |                                                                          |       |
| 51 | Data collection plan   | <a href="#">#18a</a> Plans for assessment and collection of outcome,     | 11-12 |
| 52 |                        |                                                                          |       |
| 53 |                        | baseline, and other trial data, including any related                    |       |
| 54 |                        |                                                                          |       |
| 55 |                        | processes to promote data quality (eg, duplicate                         |       |
| 56 |                        |                                                                          |       |
| 57 |                        | measurements, training of assessors) and a                               |       |
| 58 |                        |                                                                          |       |
| 59 |                        |                                                                          |       |
| 60 |                        |                                                                          |       |

description of study instruments (eg, questionnaires, laboratory tests) along with their reliability and validity, if known. Reference to where data collection forms can be found, if not in the protocol

|    |                        |                      |                                                        |
|----|------------------------|----------------------|--------------------------------------------------------|
| 1  |                        |                      |                                                        |
| 2  |                        |                      |                                                        |
| 3  |                        |                      |                                                        |
| 4  |                        |                      |                                                        |
| 5  |                        |                      |                                                        |
| 6  |                        |                      |                                                        |
| 7  |                        |                      |                                                        |
| 8  |                        |                      |                                                        |
| 9  |                        |                      |                                                        |
| 10 |                        |                      |                                                        |
| 11 |                        |                      |                                                        |
| 12 |                        |                      |                                                        |
| 13 | Data collection plan:  | <a href="#">#18b</a> | Plans to promote participant retention and             |
| 14 |                        |                      |                                                        |
| 15 | retention              |                      | complete follow-up, including list of any outcome      |
| 16 |                        |                      |                                                        |
| 17 |                        |                      | data to be collected for participants who              |
| 18 |                        |                      |                                                        |
| 19 |                        |                      | discontinue or deviate from intervention protocols     |
| 20 |                        |                      |                                                        |
| 21 |                        |                      |                                                        |
| 22 | Data management        | <a href="#">#19</a>  | Plans for data entry, coding, security, and storage,   |
| 23 |                        |                      |                                                        |
| 24 |                        |                      | including any related processes to promote data        |
| 25 |                        |                      |                                                        |
| 26 |                        |                      | quality (eg, double data entry; range checks for       |
| 27 |                        |                      |                                                        |
| 28 |                        |                      | data values). Reference to where details of data       |
| 29 |                        |                      |                                                        |
| 30 |                        |                      | management procedures can be found, if not in the      |
| 31 |                        |                      |                                                        |
| 32 |                        |                      | protocol                                               |
| 33 |                        |                      |                                                        |
| 34 |                        |                      |                                                        |
| 35 |                        |                      |                                                        |
| 36 |                        |                      |                                                        |
| 37 | Statistics: outcomes   | <a href="#">#20a</a> | Statistical methods for analysing primary and          |
| 38 |                        |                      |                                                        |
| 39 |                        |                      | secondary outcomes. Reference to where other           |
| 40 |                        |                      |                                                        |
| 41 |                        |                      | details of the statistical analysis plan can be found, |
| 42 |                        |                      |                                                        |
| 43 |                        |                      | if not in the protocol                                 |
| 44 |                        |                      |                                                        |
| 45 |                        |                      |                                                        |
| 46 |                        |                      |                                                        |
| 47 | Statistics: additional | <a href="#">#20b</a> | Methods for any additional analyses (eg, subgroup      |
| 48 |                        |                      |                                                        |
| 49 | analyses               |                      | and adjusted analyses)                                 |
| 50 |                        |                      |                                                        |
| 51 |                        |                      |                                                        |
| 52 | Statistics: analysis   | <a href="#">#20c</a> | Definition of analysis population relating to protocol |
| 53 |                        |                      |                                                        |
| 54 | population and         |                      | non-adherence (eg, as randomised analysis), and        |
| 55 |                        |                      |                                                        |
| 56 | missing data           |                      |                                                        |
| 57 |                        |                      |                                                        |
| 58 |                        |                      |                                                        |
| 59 |                        |                      |                                                        |
| 60 |                        |                      |                                                        |

any statistical methods to handle missing data (eg,  
multiple imputation)

## Methods: Monitoring

|                                      |                      |                                                                                                                                                                                                                                                                                                                                                         |     |
|--------------------------------------|----------------------|---------------------------------------------------------------------------------------------------------------------------------------------------------------------------------------------------------------------------------------------------------------------------------------------------------------------------------------------------------|-----|
| Data monitoring:<br>formal committee | <a href="#">#21a</a> | Composition of data monitoring committee (DMC);<br>summary of its role and reporting structure;<br>statement of whether it is independent from the<br>sponsor and competing interests; and reference to<br>where further details about its charter can be<br>found, if not in the protocol. Alternatively, an<br>explanation of why a DMC is not needed | 6   |
| Data monitoring:<br>interim analysis | <a href="#">#21b</a> | Description of any interim analyses and stopping<br>guidelines, including who will have access to these<br>interim results and make the final decision to<br>terminate the trial                                                                                                                                                                        | 6   |
| Harms                                | <a href="#">#22</a>  | Plans for collecting, assessing, reporting, and<br>managing solicited and spontaneously reported<br>adverse events and other unintended effects of<br>trial interventions or trial conduct                                                                                                                                                              | 12  |
| Auditing                             | <a href="#">#23</a>  | Frequency and procedures for auditing trial<br>conduct, if any, and whether the process will be<br>independent from investigators and the sponsor                                                                                                                                                                                                       | N/A |

## Ethics and dissemination

|    |                    |                      |                                                        |            |
|----|--------------------|----------------------|--------------------------------------------------------|------------|
| 1  | Research ethics    | <a href="#">#24</a>  | Plans for seeking research ethics committee /          | <b>16</b>  |
| 2  |                    |                      |                                                        |            |
| 3  | approval           |                      | institutional review board (REC / IRB) approval        |            |
| 4  |                    |                      |                                                        |            |
| 5  |                    |                      |                                                        |            |
| 6  | Protocol           | <a href="#">#25</a>  | Plans for communicating important protocol             | <b>N/A</b> |
| 7  |                    |                      |                                                        |            |
| 8  | amendments         |                      | modifications (eg, changes to eligibility criteria,    |            |
| 9  |                    |                      | outcomes, analyses) to relevant parties (eg,           |            |
| 10 |                    |                      | investigators, REC / IRBs, trial participants, trial   |            |
| 11 |                    |                      | registries, journals, regulators)                      |            |
| 12 |                    |                      |                                                        |            |
| 13 |                    |                      |                                                        |            |
| 14 |                    |                      |                                                        |            |
| 15 |                    |                      |                                                        |            |
| 16 |                    |                      |                                                        |            |
| 17 |                    |                      |                                                        |            |
| 18 | Consent or assent  | <a href="#">#26a</a> | Who will obtain informed consent or assent from        | <b>14</b>  |
| 19 |                    |                      |                                                        |            |
| 20 |                    |                      | potential trial participants or authorised surrogates, |            |
| 21 |                    |                      | and how (see Item 32)                                  |            |
| 22 |                    |                      |                                                        |            |
| 23 |                    |                      |                                                        |            |
| 24 |                    |                      |                                                        |            |
| 25 |                    |                      |                                                        |            |
| 26 | Consent or assent: | <a href="#">#26b</a> | Additional consent provisions for collection and use   | <b>N/A</b> |
| 27 |                    |                      |                                                        |            |
| 28 | ancillary studies  |                      | of participant data and biological specimens in        |            |
| 29 |                    |                      | ancillary studies, if applicable                       |            |
| 30 |                    |                      |                                                        |            |
| 31 |                    |                      |                                                        |            |
| 32 |                    |                      |                                                        |            |
| 33 |                    |                      |                                                        |            |
| 34 | Confidentiality    | <a href="#">#27</a>  | How personal information about potential and           | <b>14</b>  |
| 35 |                    |                      |                                                        |            |
| 36 |                    |                      | enrolled participants will be collected, shared, and   |            |
| 37 |                    |                      |                                                        |            |
| 38 |                    |                      | maintained in order to protect confidentiality         |            |
| 39 |                    |                      | before, during, and after the trial                    |            |
| 40 |                    |                      |                                                        |            |
| 41 |                    |                      |                                                        |            |
| 42 |                    |                      |                                                        |            |
| 43 |                    |                      |                                                        |            |
| 44 | Declaration of     | <a href="#">#28</a>  | Financial and other competing interests for            | <b>16</b>  |
| 45 |                    |                      |                                                        |            |
| 46 | interests          |                      | principal investigators for the overall trial and each |            |
| 47 |                    |                      | study site                                             |            |
| 48 |                    |                      |                                                        |            |
| 49 |                    |                      |                                                        |            |
| 50 |                    |                      |                                                        |            |
| 51 | Data access        | <a href="#">#29</a>  | Statement of who will have access to the final trial   | <b>16</b>  |
| 52 |                    |                      |                                                        |            |
| 53 |                    |                      | dataset, and disclosure of contractual agreements      |            |
| 54 |                    |                      | that limit such access for investigators               |            |
| 55 |                    |                      |                                                        |            |
| 56 |                    |                      |                                                        |            |
| 57 |                    |                      |                                                        |            |
| 58 |                    |                      |                                                        |            |
| 59 |                    |                      |                                                        |            |
| 60 |                    |                      |                                                        |            |

|                                                                                                  |                                                   |                      |                                                                                                                                                                                                                                                                                                       |                              |
|--------------------------------------------------------------------------------------------------|---------------------------------------------------|----------------------|-------------------------------------------------------------------------------------------------------------------------------------------------------------------------------------------------------------------------------------------------------------------------------------------------------|------------------------------|
| 1<br>2<br>3<br>4<br>5<br>6<br>7                                                                  | Ancillary and post<br>trial care                  | <a href="#">#30</a>  | Provisions, if any, for ancillary and post-trial care,<br>and for compensation to those who suffer harm<br>from trial participation                                                                                                                                                                   | N/A                          |
| 8<br>9<br>10<br>11<br>12<br>13<br>14<br>15<br>16<br>17<br>18<br>19<br>20<br>21<br>22<br>23<br>24 | Dissemination<br>policy: trial results            | <a href="#">#31a</a> | Plans for investigators and sponsor to<br>communicate trial results to participants,<br>healthcare professionals, the public, and other<br>relevant groups (eg, via publication, reporting in<br>results databases, or other data sharing<br>arrangements), including any publication<br>restrictions | 14                           |
| 25<br>26<br>27<br>28<br>29<br>30                                                                 | Dissemination<br>policy: authorship               | <a href="#">#31b</a> | Authorship eligibility guidelines and any intended<br>use of professional writers                                                                                                                                                                                                                     | N/A                          |
| 31<br>32<br>33<br>34<br>35<br>36<br>37                                                           | Dissemination<br>policy: reproducible<br>research | <a href="#">#31c</a> | Plans, if any, for granting public access to the full<br>protocol, participant-level dataset, and statistical<br>code                                                                                                                                                                                 | N/A                          |
| 38<br>39<br>40                                                                                   | <b>Appendices</b>                                 |                      |                                                                                                                                                                                                                                                                                                       |                              |
| 41<br>42<br>43<br>44<br>45<br>46<br>47<br>48                                                     | Informed consent<br>materials                     | <a href="#">#32</a>  | Model consent form and other related<br>documentation given to participants and authorised<br>surrogates                                                                                                                                                                                              | See<br>Supplementary<br>file |
| 49<br>50<br>51<br>52<br>53<br>54<br>55<br>56<br>57<br>58<br>59<br>60                             | Biological<br>specimens                           | <a href="#">#33</a>  | Plans for collection, laboratory evaluation, and<br>storage of biological specimens for genetic or<br>molecular analysis in the current trial and for future<br>use in ancillary studies, if applicable                                                                                               | N/A                          |



1 None The SPIRIT checklist is distributed under the terms of the Creative Commons Attribution  
2  
3 License CC-BY-ND 3.0. This checklist can be completed online using <https://www.goodreports.org/>, a  
4  
5 tool made by the [EQUATOR Network](#) in collaboration with [Penelope.ai](#)  
6  
7  
8  
9  
10  
11  
12  
13  
14  
15  
16  
17  
18  
19  
20  
21  
22  
23  
24  
25  
26  
27  
28  
29  
30  
31  
32  
33  
34  
35  
36  
37  
38  
39  
40  
41  
42  
43  
44  
45  
46  
47  
48  
49  
50  
51  
52  
53  
54  
55  
56  
57  
58  
59  
60
